# Supplementary material for: Characterizing the Social-Ecological System for Inland Freshwater Salinization using Fuzzy Cognitive Maps: Implications for Collective Management
Source: Research Square preprint supplement (doi:10.21203/rs.3.rs-2592258/v1), 2023-04-12
Supplement: Supplementary file 1 [file ec6974d875cbbf49e3b935e0.docx]

Characterizing the Social-Ecological System for Inland Freshwater Salinization using Fuzzy Cognitive Maps: Implications for Collective Management

*Supplemental Information*

Rippy, M.A.*1,2,3, Grant, S.B. 1,2, Roston, B.1,3, Berglund, E.4, Aminpour, P.5, Krauss, L.1, Bhide, S.V.1, Schenk, T.6, Rowles, K.7, Misra, S.8, Birkland, T.9, Kaushal, S.10

*1: Occoquan Watershed Monitoring Laboratory, The Charles E. Via, Jr. Department of Civil and*

*Environmental Engineering, Virginia Tech, 9408 Prince William Street, Manassas VA, USA*

*2: Center for Coastal Studies, Virginia Tech, 1068A Derring Hall (0420), Blacksburg, VA, USA*

*3: Disaster Resilience and Risk Management (DRRM), 1068A Derring Hall, 405 Perry Street, Blacksburg, VA 24061, USA.*

*4: Department of Civil, Construction, and Environmental Engineering, North Carolina State University, Raleigh, NC, USA*

*5: Customer Research Team, Bioscience Division, Thermo Fisher Scientific, Carlsbad, California, USA*

*6: School of Public and International Affairs, Virginia Tech, Blacksburg, VA, USA*

*7: Policy Works LLC, 3410 Woodberry Ave, Baltimore, MD, USA*

*8: School of Public and International Affairs, Arlington Campus, Virginia Tech, Arlington VA, 22203, USA*

*9: School of Public and International Affairs, North Carolina State University, Raleigh, NC, USA*

*10: Department of Geology and Earth System Science Interdisciplinary Center, University of*

*Maryland, College Park, MD, USA*

**Table of Contents:**

Supplemental Tables

Supplemental Table 1: Concept list for causes of salinization

Supplemental Table 2: Concept list for factors affected by salinization

Supplemental Table 3: Concept list for actions that could be taken to mitigate salinization

Supplemental Figures

Supplemental Figure 1: Schematic of our iterative FCM collection processes

Supplemental Figure 2: Flow chart of concept consolidation: causes of salinization

Supplemental Figure 3: Flow chart of concept consolidation: consequences of salinization

Supplemental Figure 4: Flow chart of concept consolidation: mitigating actions

Supplemental Figure 5: Individual stakeholder Fuzzy Cognitive Maps

TABLES

| **TABLE 1: Concepts that contribute to salinization of the Occoquan reservoir and tributaries** | |
| --- | --- |
| ***Concept Abbreviation*** | ***Concept Definition*** |
| Salts released from industry *(e.g., discharge of salts from manufacturing)* | Discharge of salts to the sewage collection system or to streams in the Occoquan watershed from manufacturing and other industrial sources |
| Salts added to the sewer by food/human excretion | Salts discharged to the sewage collection system from human urine or feces |
| Salts released from winter maintenance activities (private – commercial entities) | Salts added from the application of anti-icing and deicing agents to roads or parking lots by **private, commercial entities**. *Includes unintended (indirect) application of salts by the way these chemicals are stored and transported* |
| Salts released from products used outside residences or commercial buildings for purposes other than winter maintenance *(e.g. fertilizers, vehicle cleaning products)* | Salts added from the outdoor application of chemicals for purposes other than winter maintenance (e.g., use of detergents, fertilizers, etc., outside of homes, offices, or commercial buildings) |
| Salts added during the treatment of drinking water | Salts that are introduced as part of the drinking water treatment process (disinfection, softening, pH control, etc.) |
| Salts released from local geology | Salts from dissolution of natural bedrock or soils |
| Impervious surface area | Surfaces that are not permeable to rainfall and that generate runoff, including rooftops, parking lots and roads (a consequence of urbanization) |
| Salts added to the sewer from use of cleaning and personal care products and water softeners inside residences or commercial buildings | Use and discharge or disposal of salts into the sewer system from cleaning and personal care products and water softeners in homes, offices or commercial buildings (e.g., detergents, soaps, water softening chemicals, etc.) |
| Salts released from discharge of treated wastewater | Highly treated wastewater discharged by UOSA to Bull Run, a tributary of the Occoquan watershed |
| Salts released from agricultural activities | Nonpoint source salt inputs due to outdoor application of fertilizer and other chemicals in the agricultural sector |
| Population and economic development | The number of people that reside in the Occoquan watershed and the size of its economy |
| Salts added during the treatment of wastewater | Salts that are introduced as part of the wastewater treatment process (chlorination, dechlorination, pH control, etc.) |
| Salts released from winter maintenance activities (public entities) | Salts added from the application of anti-icing and deicing agents on **public roads (e.g., VDOT)**. *Includes unintended (indirect) application of salts by the way these chemicals are stored and transported* |
| Salts released from concrete dissolution (urban karst) and infrastructure corrosion | Salts from corrosion of urban infrastructure (including concrete) |
| Salts released from winter maintenance activities (private – residential entities) | Salts added from the application of anti-icing and deicing agents to roads or driveways by **residential homeowners**. *Includes unintended (indirect) application of salts by the way these chemicals are stored and transported* |

| **TABLE 2: Factors affected by salinization of the Occoquan reservoir and tributaries** | |
| --- | --- |
| ***Concept Abbreviation*** | ***Concept Definition*** |
| Infrastructure longevity | The lifetime of built infrastructure (e.g., pipes for water and wastewater distribution, concrete or metal structures, etc.) |
| Reputation of the winter management industry | Public perception of the businesses and agencies that apply salt (e.g., the extent to which they are careful, environmentally conscious, and safe) |
| Public advocacy for new salt management policies that are not science-based (i.e., reflecting misperceptions, not facts) | New salt management policies are advocated for that reflect incomplete information or a misunderstanding of freshwater salinization, its causes, or its consequences |
| Environmental justice | Equal access to healthy ecosystems and safe drinking water |
| Sustainable, reliable, and safe drinking water supply for people | Water in the Occoquan reservoir is safe to drink and protective of the health of individuals with low sodium diets, both in the short (days to years) and long (decades to centuries) term |
| Healthy ecosystems (water quality is protective of both aquatic and terrestrial species) | Water in the Occoquan watershed is below salt thresholds that cause harm to aquatic and riparian life and can support diverse animals and plants |
| Cost of remediating legacy salt pollution in the Occoquan watershed | Cost of restoring water quality (e.g., reducing salt concentrations) in the Occoquan watershed to levels that are protective of pubic and ecosystem health |
| Soil quality in the Occoquan watershed | The quality of watershed soils (e.g., sodicity and infiltration, ion-specific toxicity, availability of essential nutrients, etc.) |
| Customer acceptance of drinking water | Drinking water is perceived as high quality and safe to drink (relatively few complaints regarding taste, odor, and color) |
| Cost of drinking water provision | Cost for treating source waters (e.g., water from the Occoquan reservoir) to meet regulatory requirements and perceptual (e.g., taste, odor, and color) goals |
| Performance of stormwater BMPs | Ability of stormwater BMPs to effectively capture/infiltrate runoff and remove pollutants |
| Benefits (beyond water supply) that people derive from healthy ecosystems | The variety of ecosystem services provided by the Occoquan reservoir and its tributaries beyond drinking water supply, including but not limited to scenic views, recreation (fishing, birding), nutrient cycling, and sequestration of nutrients such as N and P in reservoir sediments |
| Public awareness of environmental impacts of freshwater salinization | Public awareness of the impact salinization may have on human and ecosystem health |
| Sustainable water reclamation (e.g., wastewater reuse) | Discharge of highly treated wastewater to the Occoquan reservoir to maintain/augment local drinking water supplies |

| **TABLE 3: Actions that can mitigate the risk of salinization of the Occoquan reservoir and tributaries** | |
| --- | --- |
| ***Concept Abbreviation*** | ***Concept Definition*** |
| Focus on consensus building | Collaboration and consensus building among diverse stakeholder groups |
| Focus on decision support tools to inform winter-specific and year-round salt management | Implementation of decision support tools for managing multiple ions from multiple sources *(e.g., models, benefit-cost analysis, life cycle analysis).* Includes, but is not limited to decision support for winter salt management |
| Focus on regulating population growth in the watershed | Implement population management strategies geared towards regulating future population growth (e.g., family planning initiatives, restrictions on new residential development, etc.) |
| Focus on smart growth and development strategies *(new development & redevelopment)* | Implement smart growth and development strategies in the Occoquan watershed that are designed to reduce salt discharge to sewers and streams. Includes new development as well as urban redevelopment. Emphasis is on smart growth rather than restricting growth |
| Focus on regulatory frameworks for salt *(e.g., TMDL or similar)* | Salt regulatory frameworks (ion criteria, Total Maximum Daily Load (TMDL) salt use restrictions). Top-down regulation and enforcement of salt standards. Restrictions on point and nonpoint source discharge of salt |
| Focus on low-salt treatment processes and technologies for water and wastewater treatment | Adoption of low-salt water and wastewater treatment processes and technologies *(e.g., wastewater UV disinfection in place of chlorination)* |
| Focus on low-salt products for indoor and/or outdoor use | Adoption of low-salt products for indoor and/or outdoor use (e.g., behavior change). This includes use within or outside homes, offices, or commercial buildings or on roads, driveways, and parking lots to reduce salt inputs to domestic wastewater or the watershed |
| Focus on establishing a body of experts to help mitigate salinization in the Occoquan watershed | An oversight body of experts that can inform decision making about freshwater salinization and approaches to manage it in the Occoquan watershed |
| Focus on salt action plans and management protocols *(guidance docs for winter-specific and year-round management)* | Salt action plans, including source and land-use specific management and reduction protocols as well as effectiveness monitoring. This includes, but is not limited to, winter salt management plans |
| Focus on BMPs for winter maintenance by public, private-commercial or private-residential entities *(e.g.,* *for salt application, storage, training and certification)* | Implementation of BMPs (processes, technologies, or training) for winter salt management by public, private-commercial or private-residential entities. Includes best practices for anti-icer and deicer application and salt storage management as well as training/certification for both application and management. *Could involve implementing the SaMS toolkit* |
| Focus on capturing low-salinity stormwater *(e.g., Vulcan quarry)* | Develop the capacity to store low salinity stormwater in the Vulcan quarry (e.g., work towards the creation of alternative, low-salt water sources) |
| Focus on reducing the public’s level of service (LOS) expectations during/after winter storms (e.g., bare pavement expectations) | Work to moderate the public’s level of service (LOS) expectation of clear drivable roads immediately after storms. Promote new norms for winter driving behavior |
| Focus on stakeholder-driven ion thresholds to support salt management without top-down regulation (e.g., without TMDLs) | Stakeholder driven water quality guidelines for salt ions (establish thresholds of acceptability for the Occoquan reservoir and its tributaries) |
| Focus on public education and outreach *(kindergarten to adult, year-round and winter-specific content)* | Public education and outreach about freshwater salinization tailored for a range of age groups – kindergarten to adult *(what salt is, consequences of salinization, costs of management alternatives, salt use guidelines by season, etc.)* |
| Focus on funding to support ongoing salt research *(emphasis on fate and transport)* | Develop ongoing funding programs to support research on salt fate and transport mechanisms |
| Focus on education and outreach to managers *(year-round and winter-specific content)* | Education and outreach programs featuring year-round and season-specific content intended for political leaders, land managers, county supervisors, board members, and other management/governance entities |

FIGURES

**Supplemental Figure 1:** Cyclical process of SES co-production. Each cycle includes 1) generation of stakeholder-derived salinization concepts (causes, consequences, and mitigating actions), 2) generation of individual FCMs, 3) identification of stakeholders with significantly different perspectives, 4) small group discussion/evaluation of group and collective mental models of the SES, and 5) concept refinement and re-evaluation based on small group discussions. The individual, group, and collective FCMs evaluated in this study are the result of two iterations through this cycle.


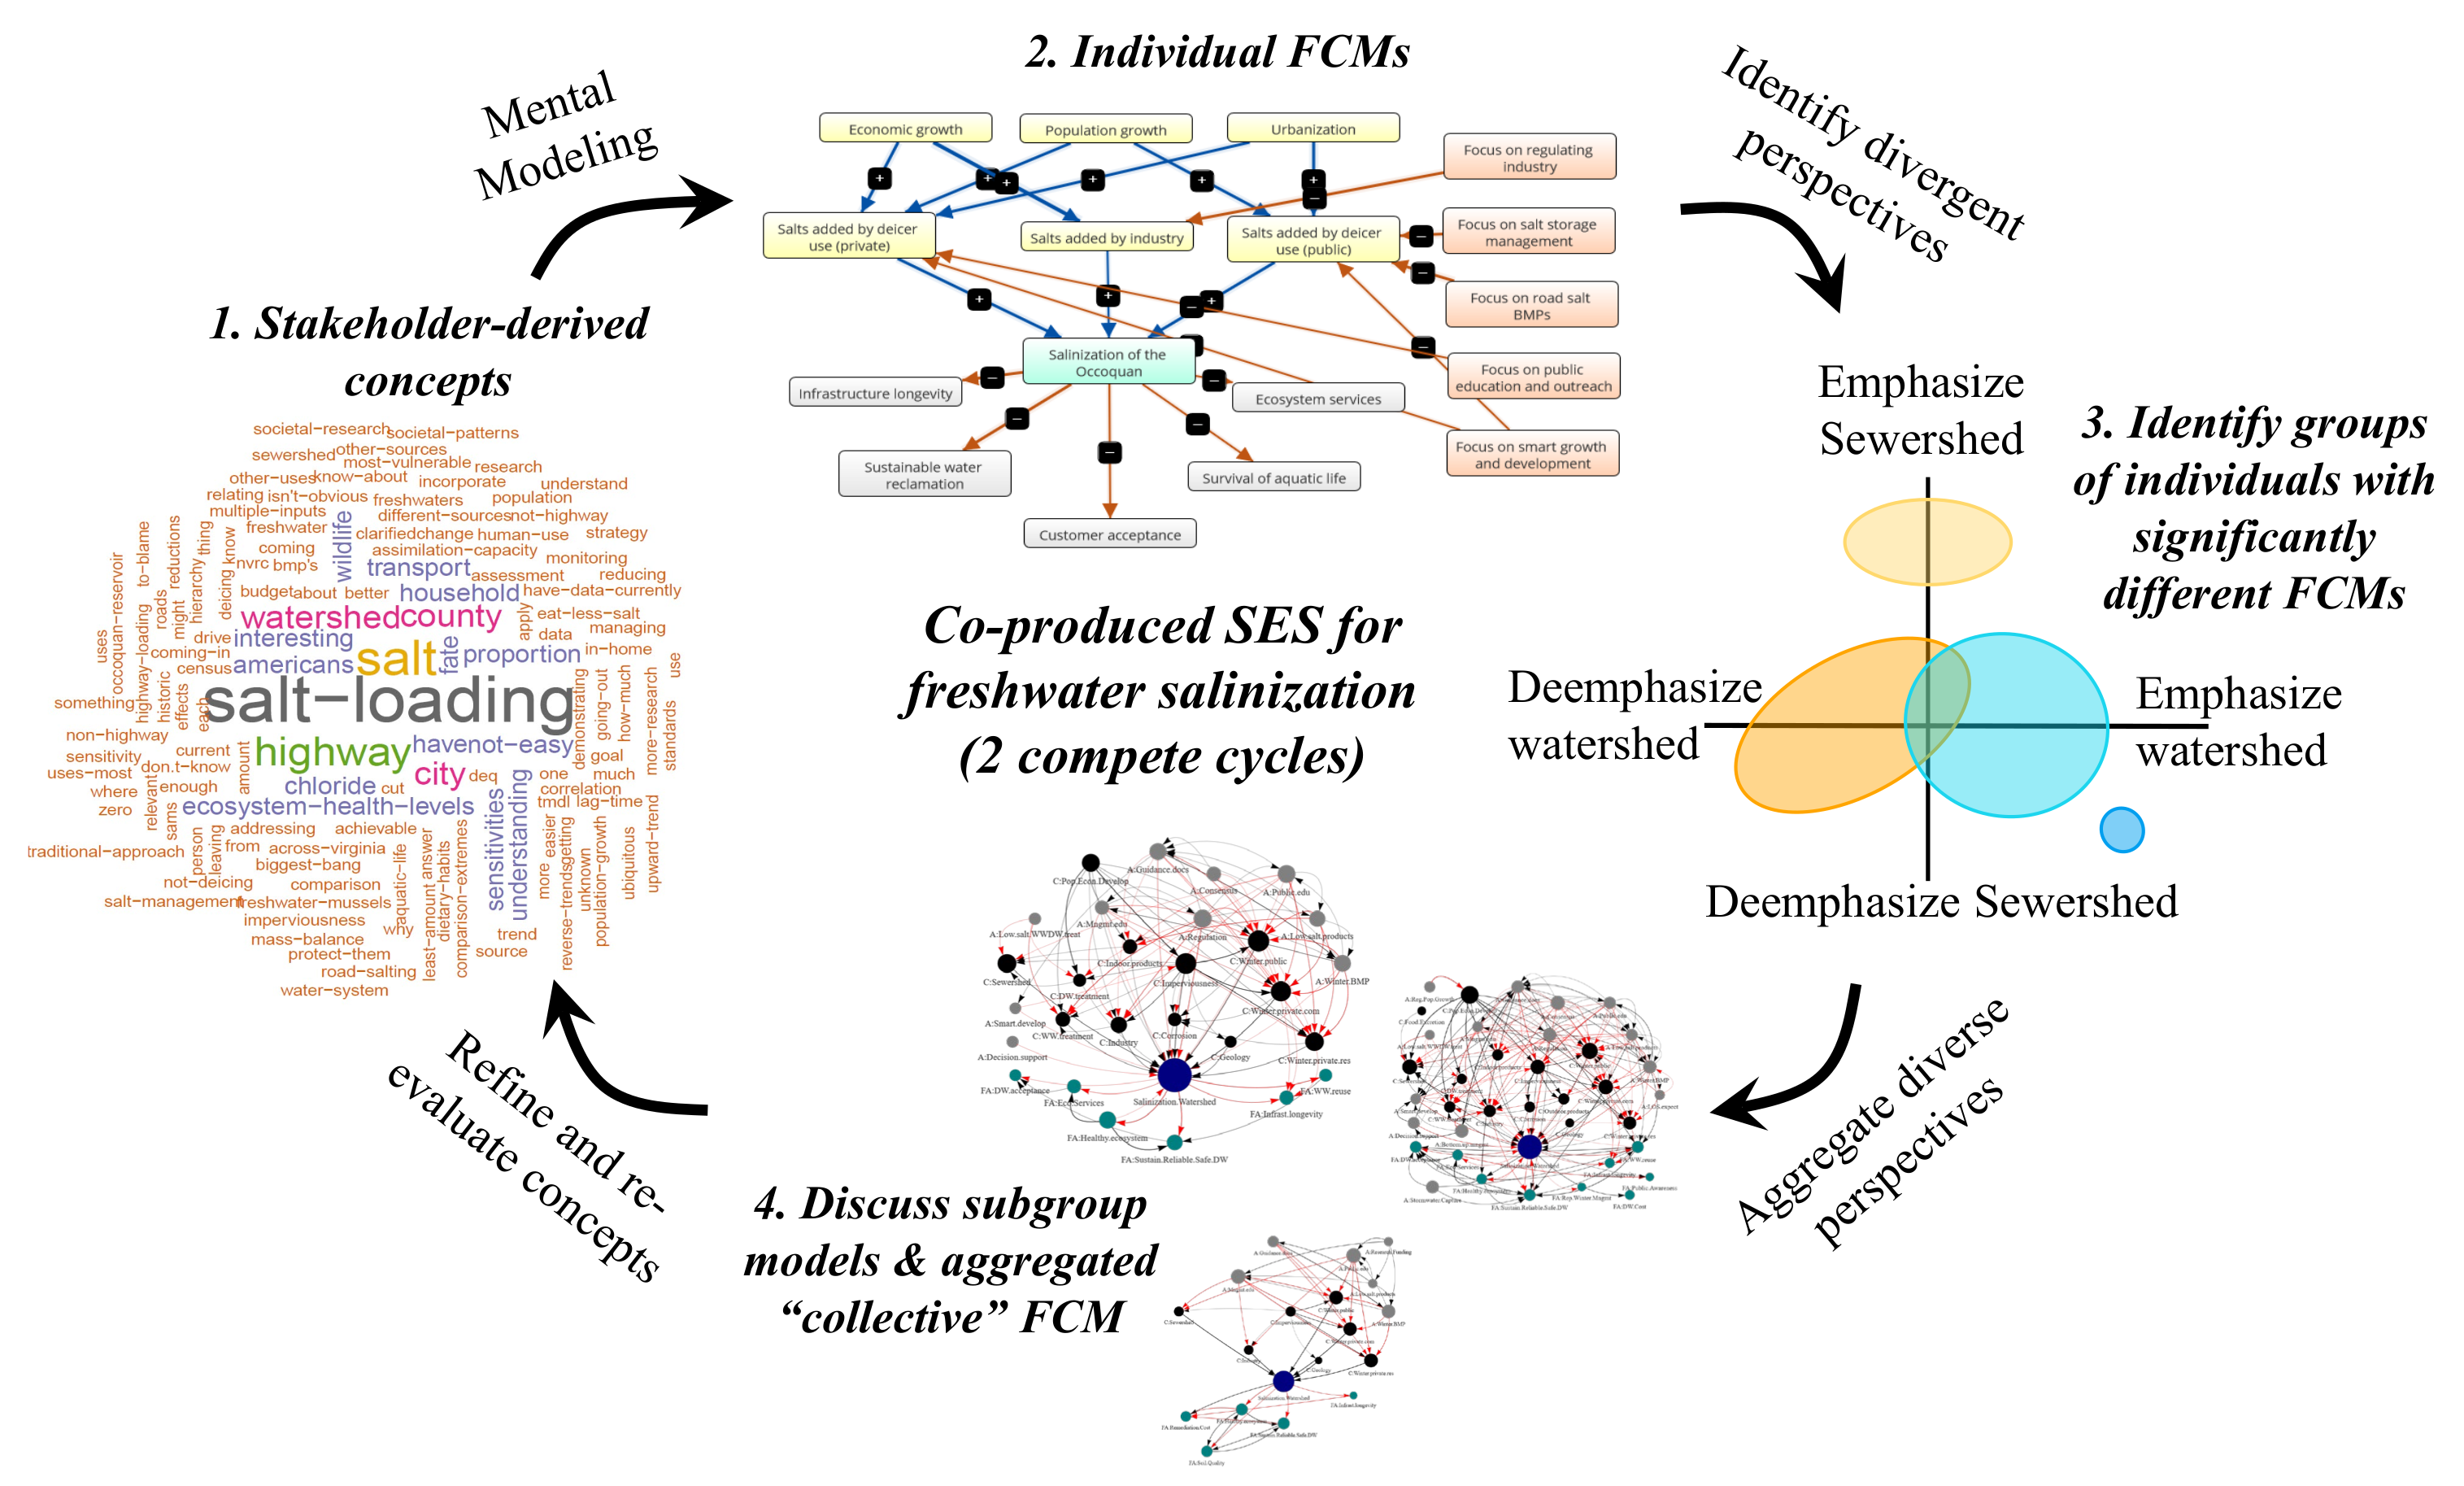


**Supplemental Figure 2**: Flow chart illustrating how concepts pertaining to causes of freshwater salinization have been consolidated and revised based on feedback from ECOS members during initial FCM interviews and small group discussions (see Supplemental Figure 1). Concepts with white (yellow) backgrounds represent initial (final) causes of freshwater salinization. New causes (added de-novo by a single stakeholder) are shown using black dashed borders. Causes are marked with a white (black) star when they primarily reflect sewershed (watershed) salt inputs.


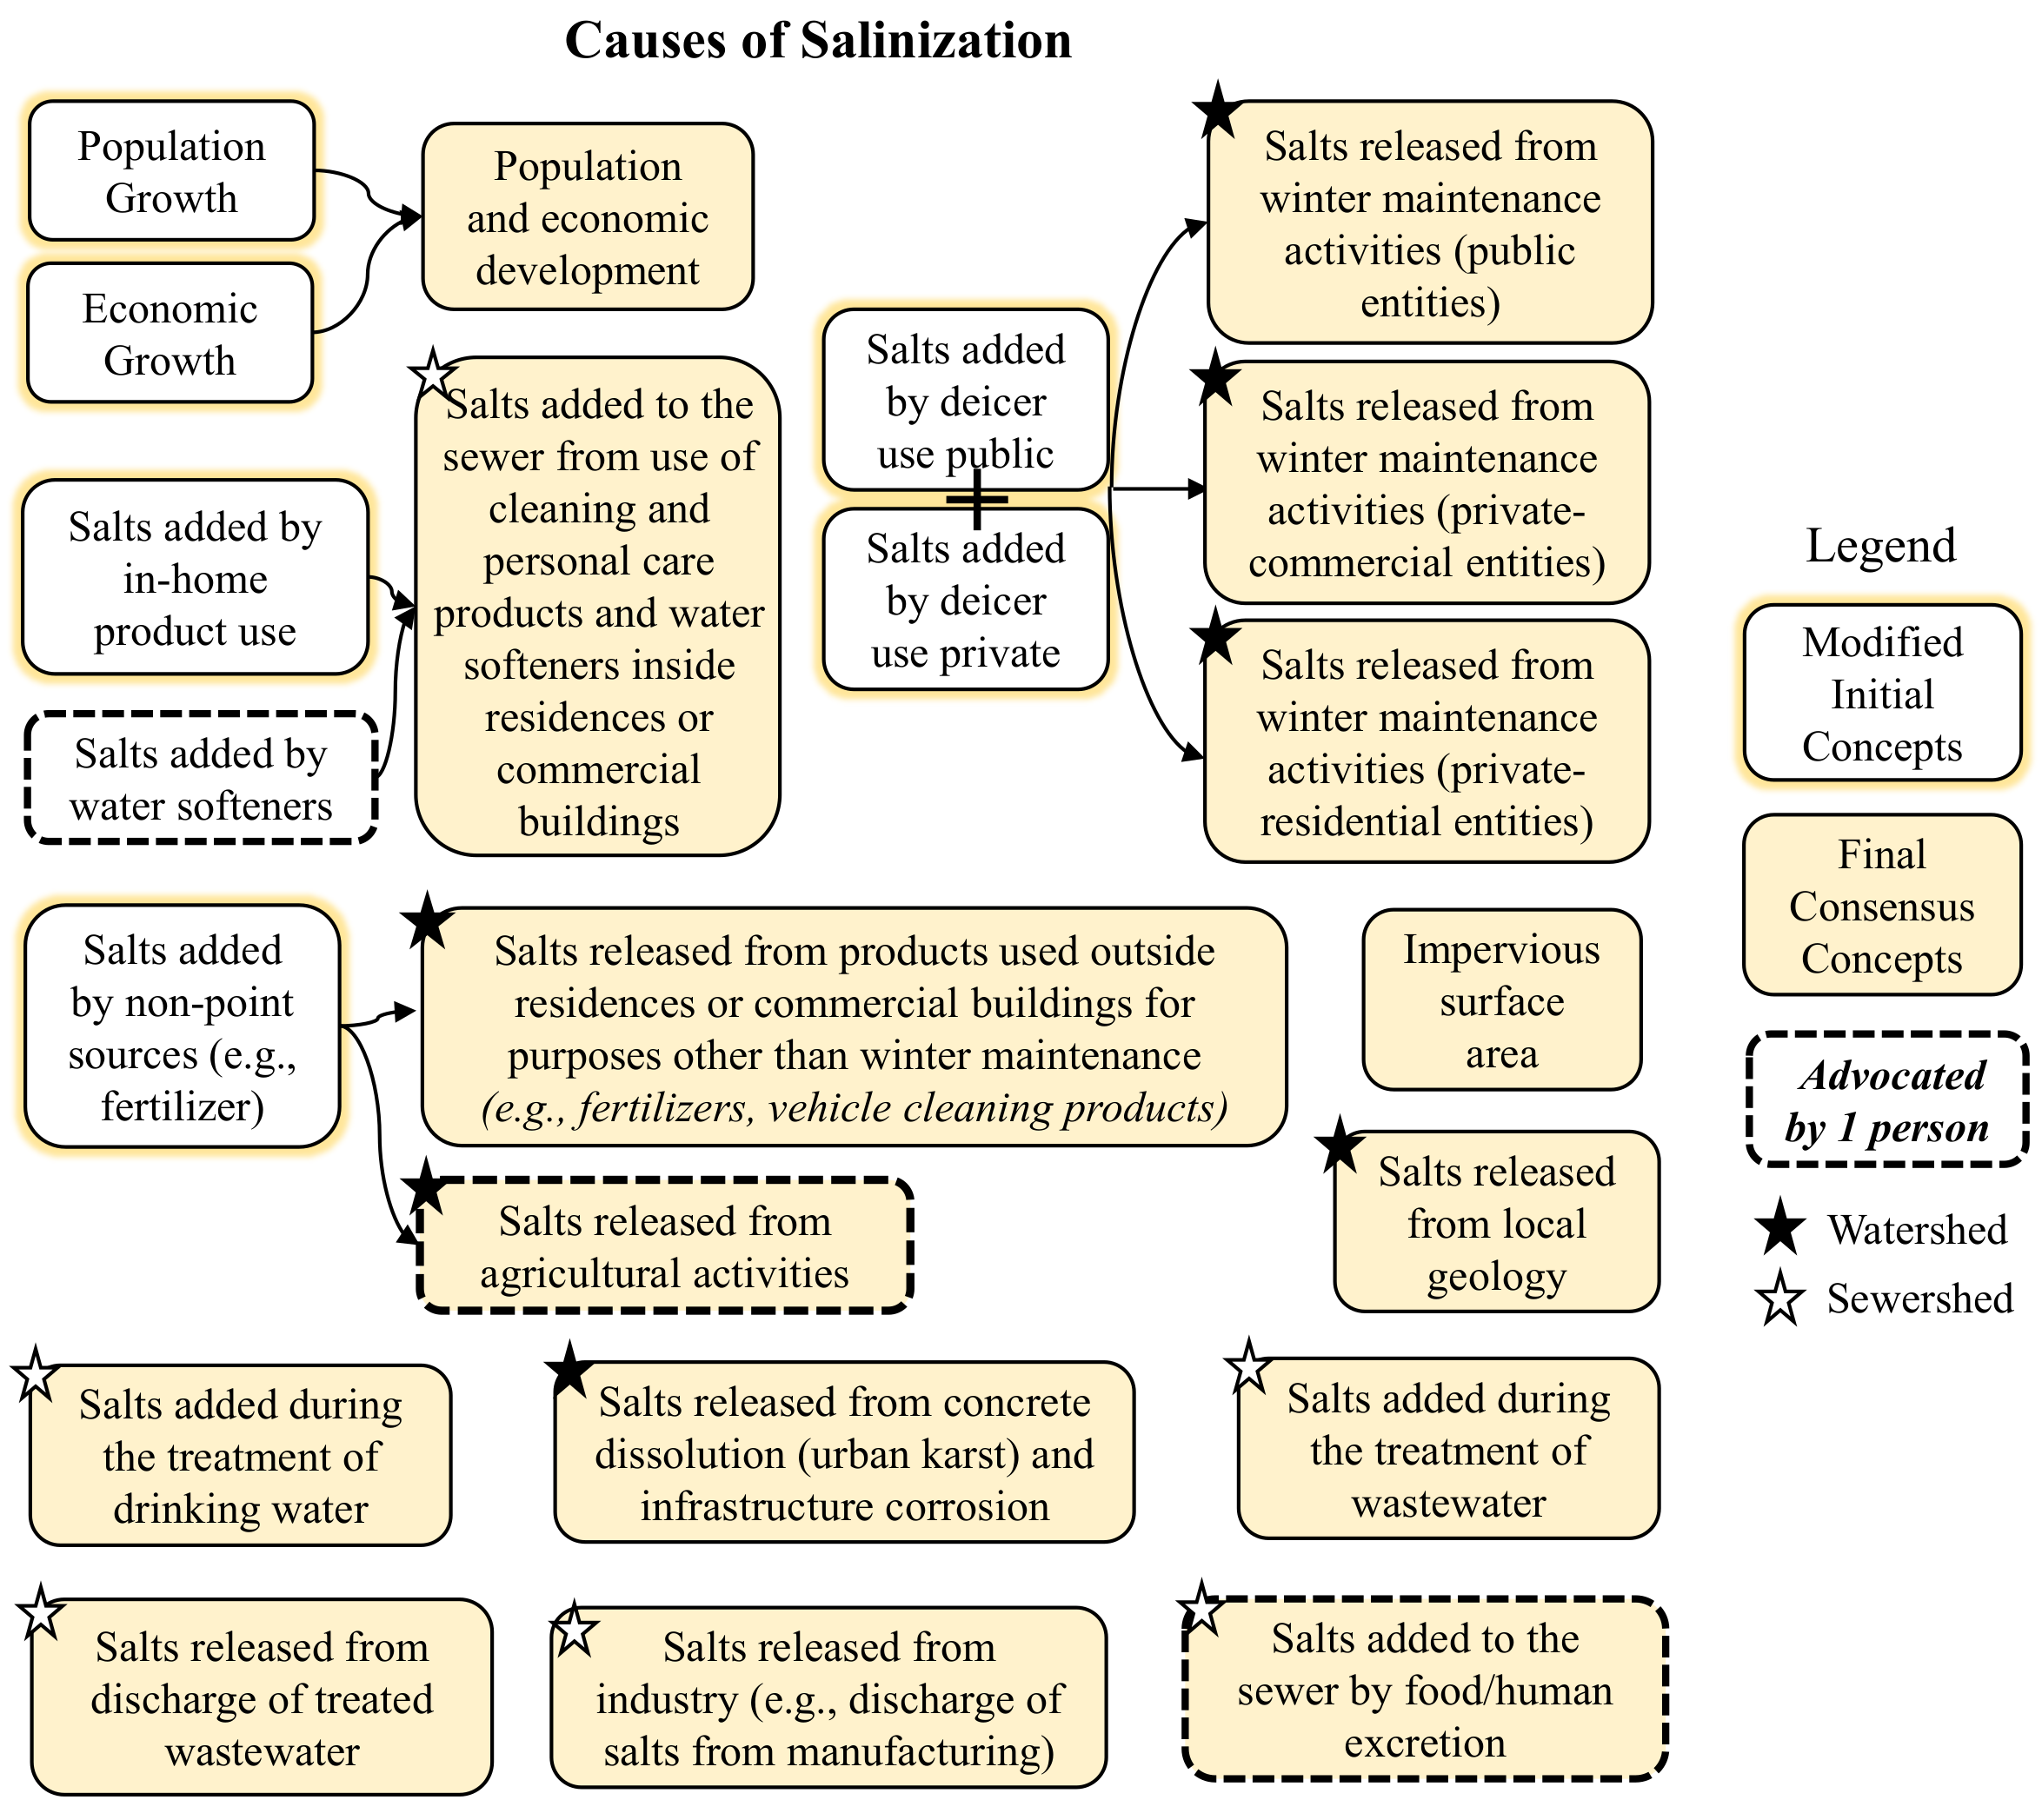


**Supplemental Figure 3**: Flow chart illustrating how concepts for factors affected by freshwater salinization have been consolidated and revised based on feedback from ECOS members during initial FCM interviews and small group discussions (see Supplemental Figure 1). Concepts with white (blue) backgrounds represent initial (final) consequences of freshwater salinization. New consequences (added de-novo by a single stakeholder) are shown using black dashed borders.


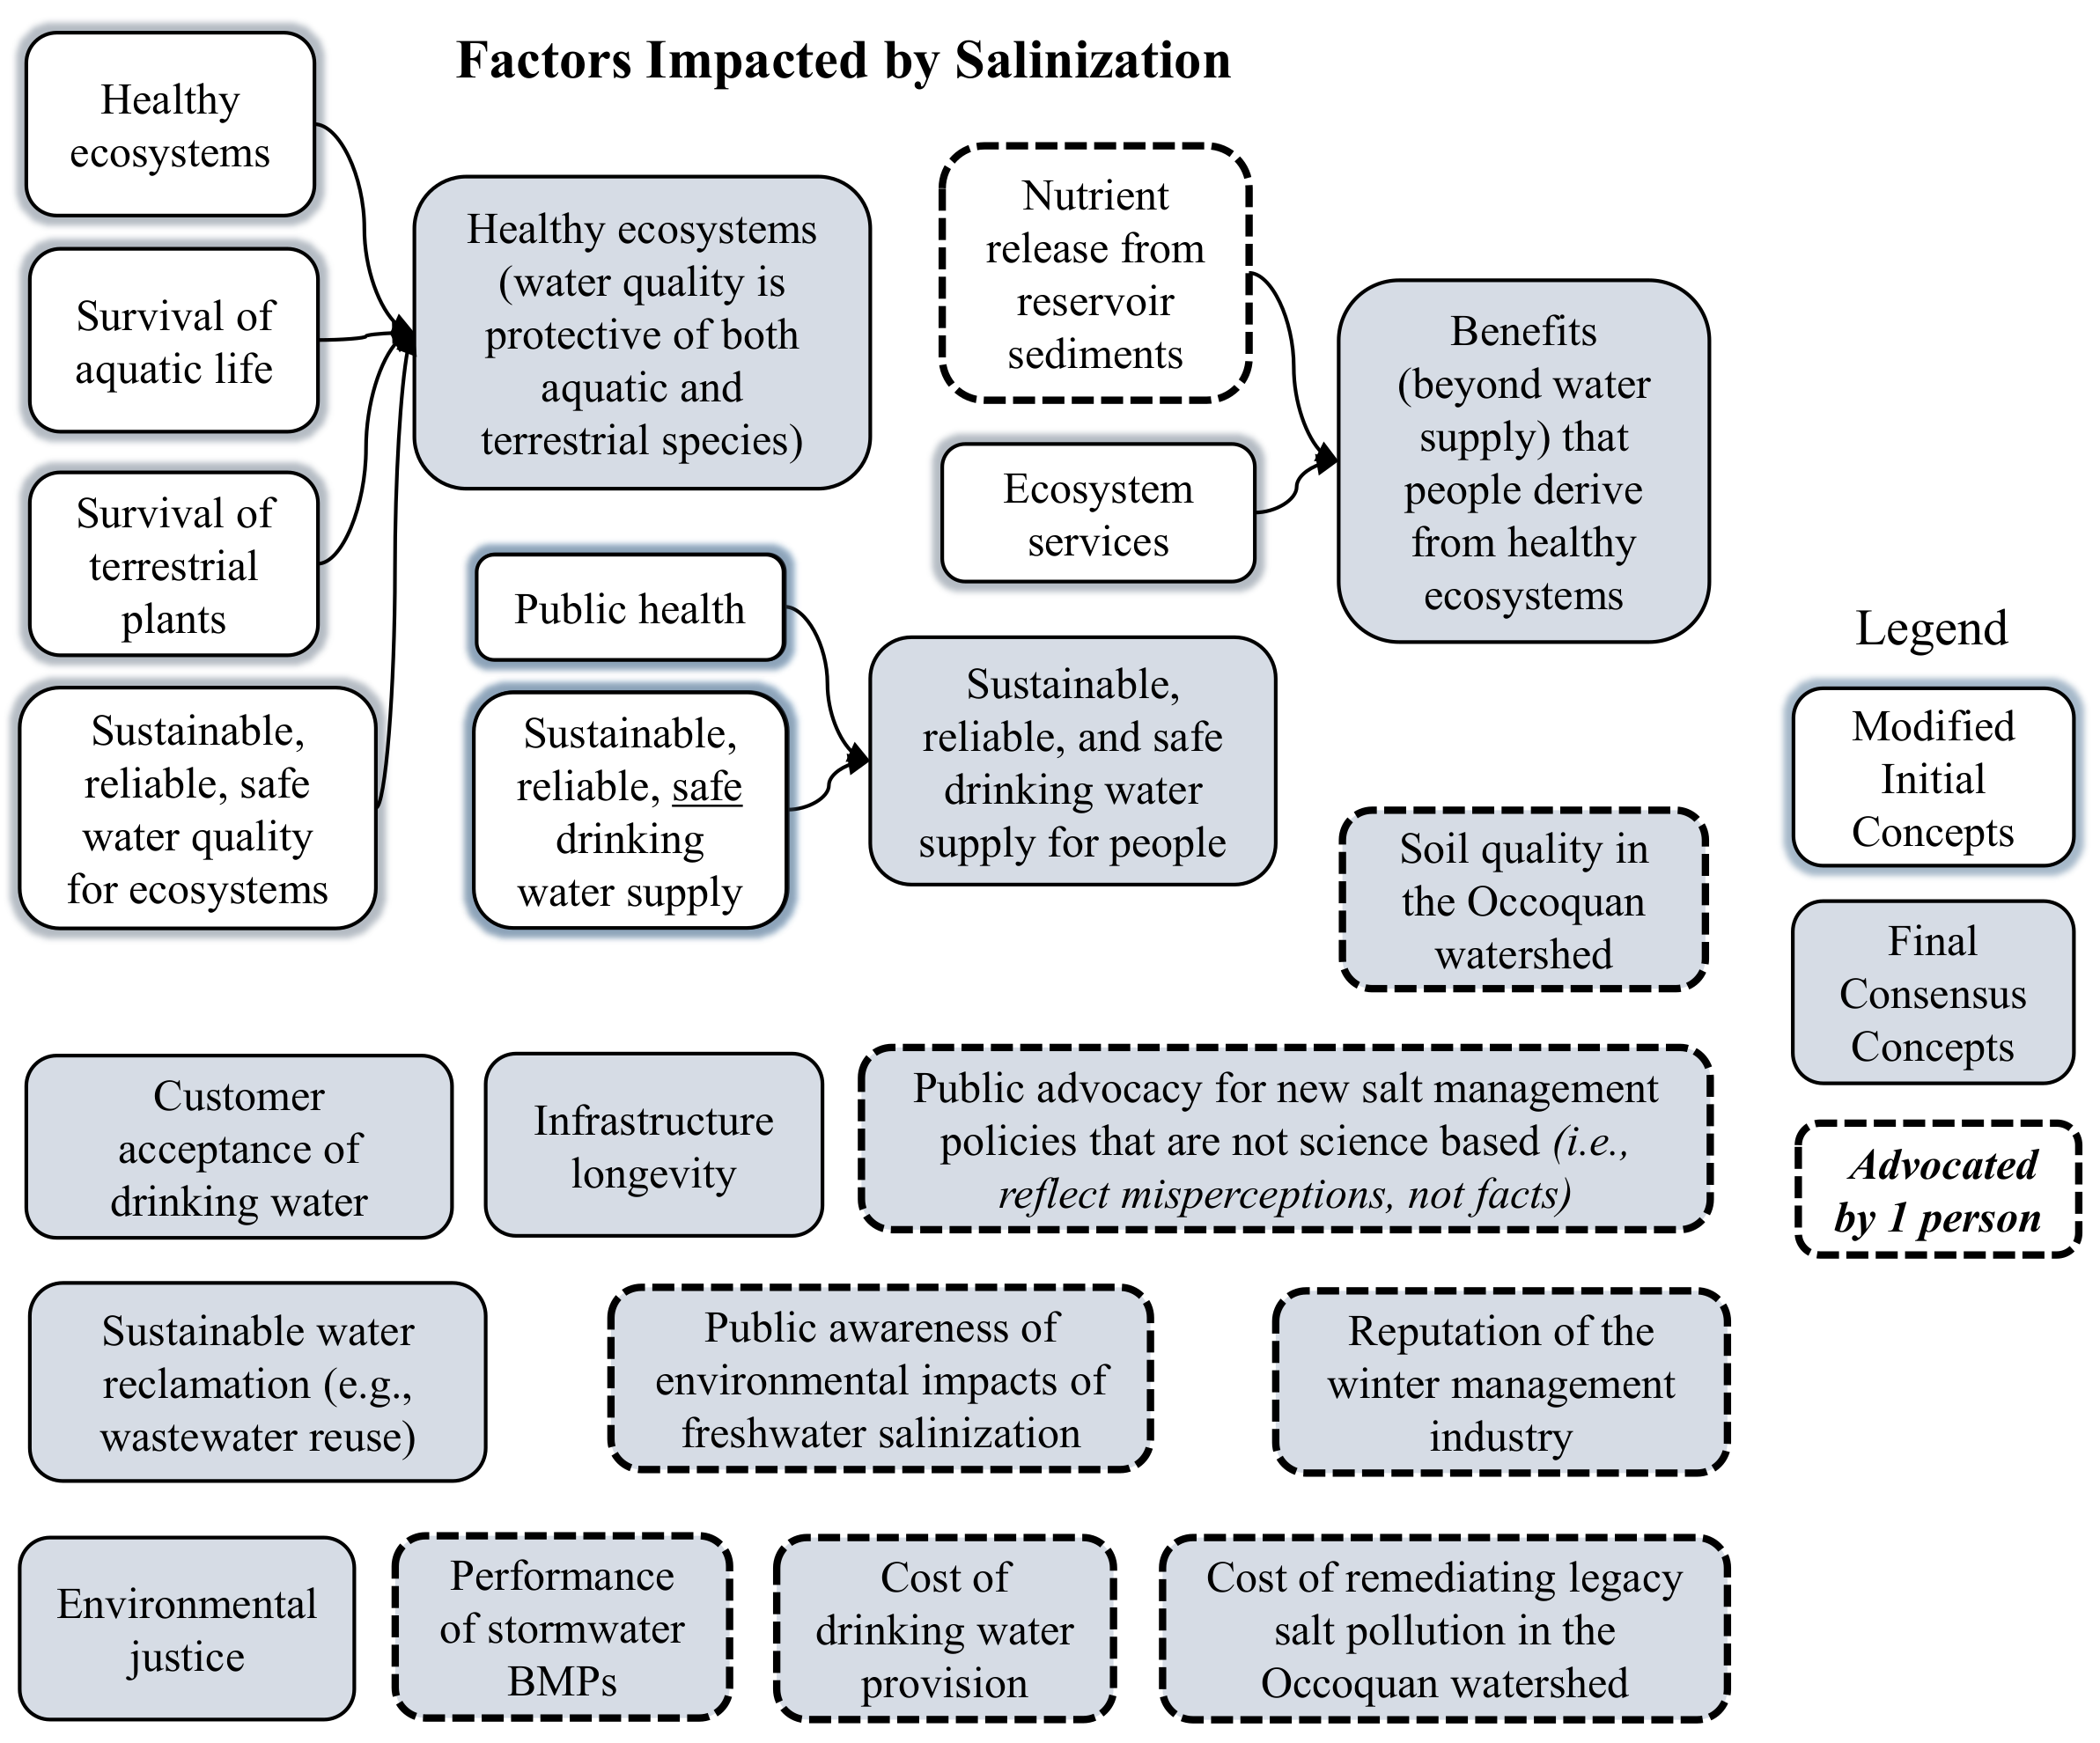


**Supplemental Figure 4**: Flow chart illustrating how concepts representing mitigating actions have been consolidated and revised based on feedback from ECOS members during initial FCM interviews and small group discussions (see Supplemental Figure 1). Concepts with white (red) backgrounds represent initial (final) actions that can be taken to mitigate freshwater salinization. New consequences (added de-novo by a single stakeholder) are shown using black dashed borders.


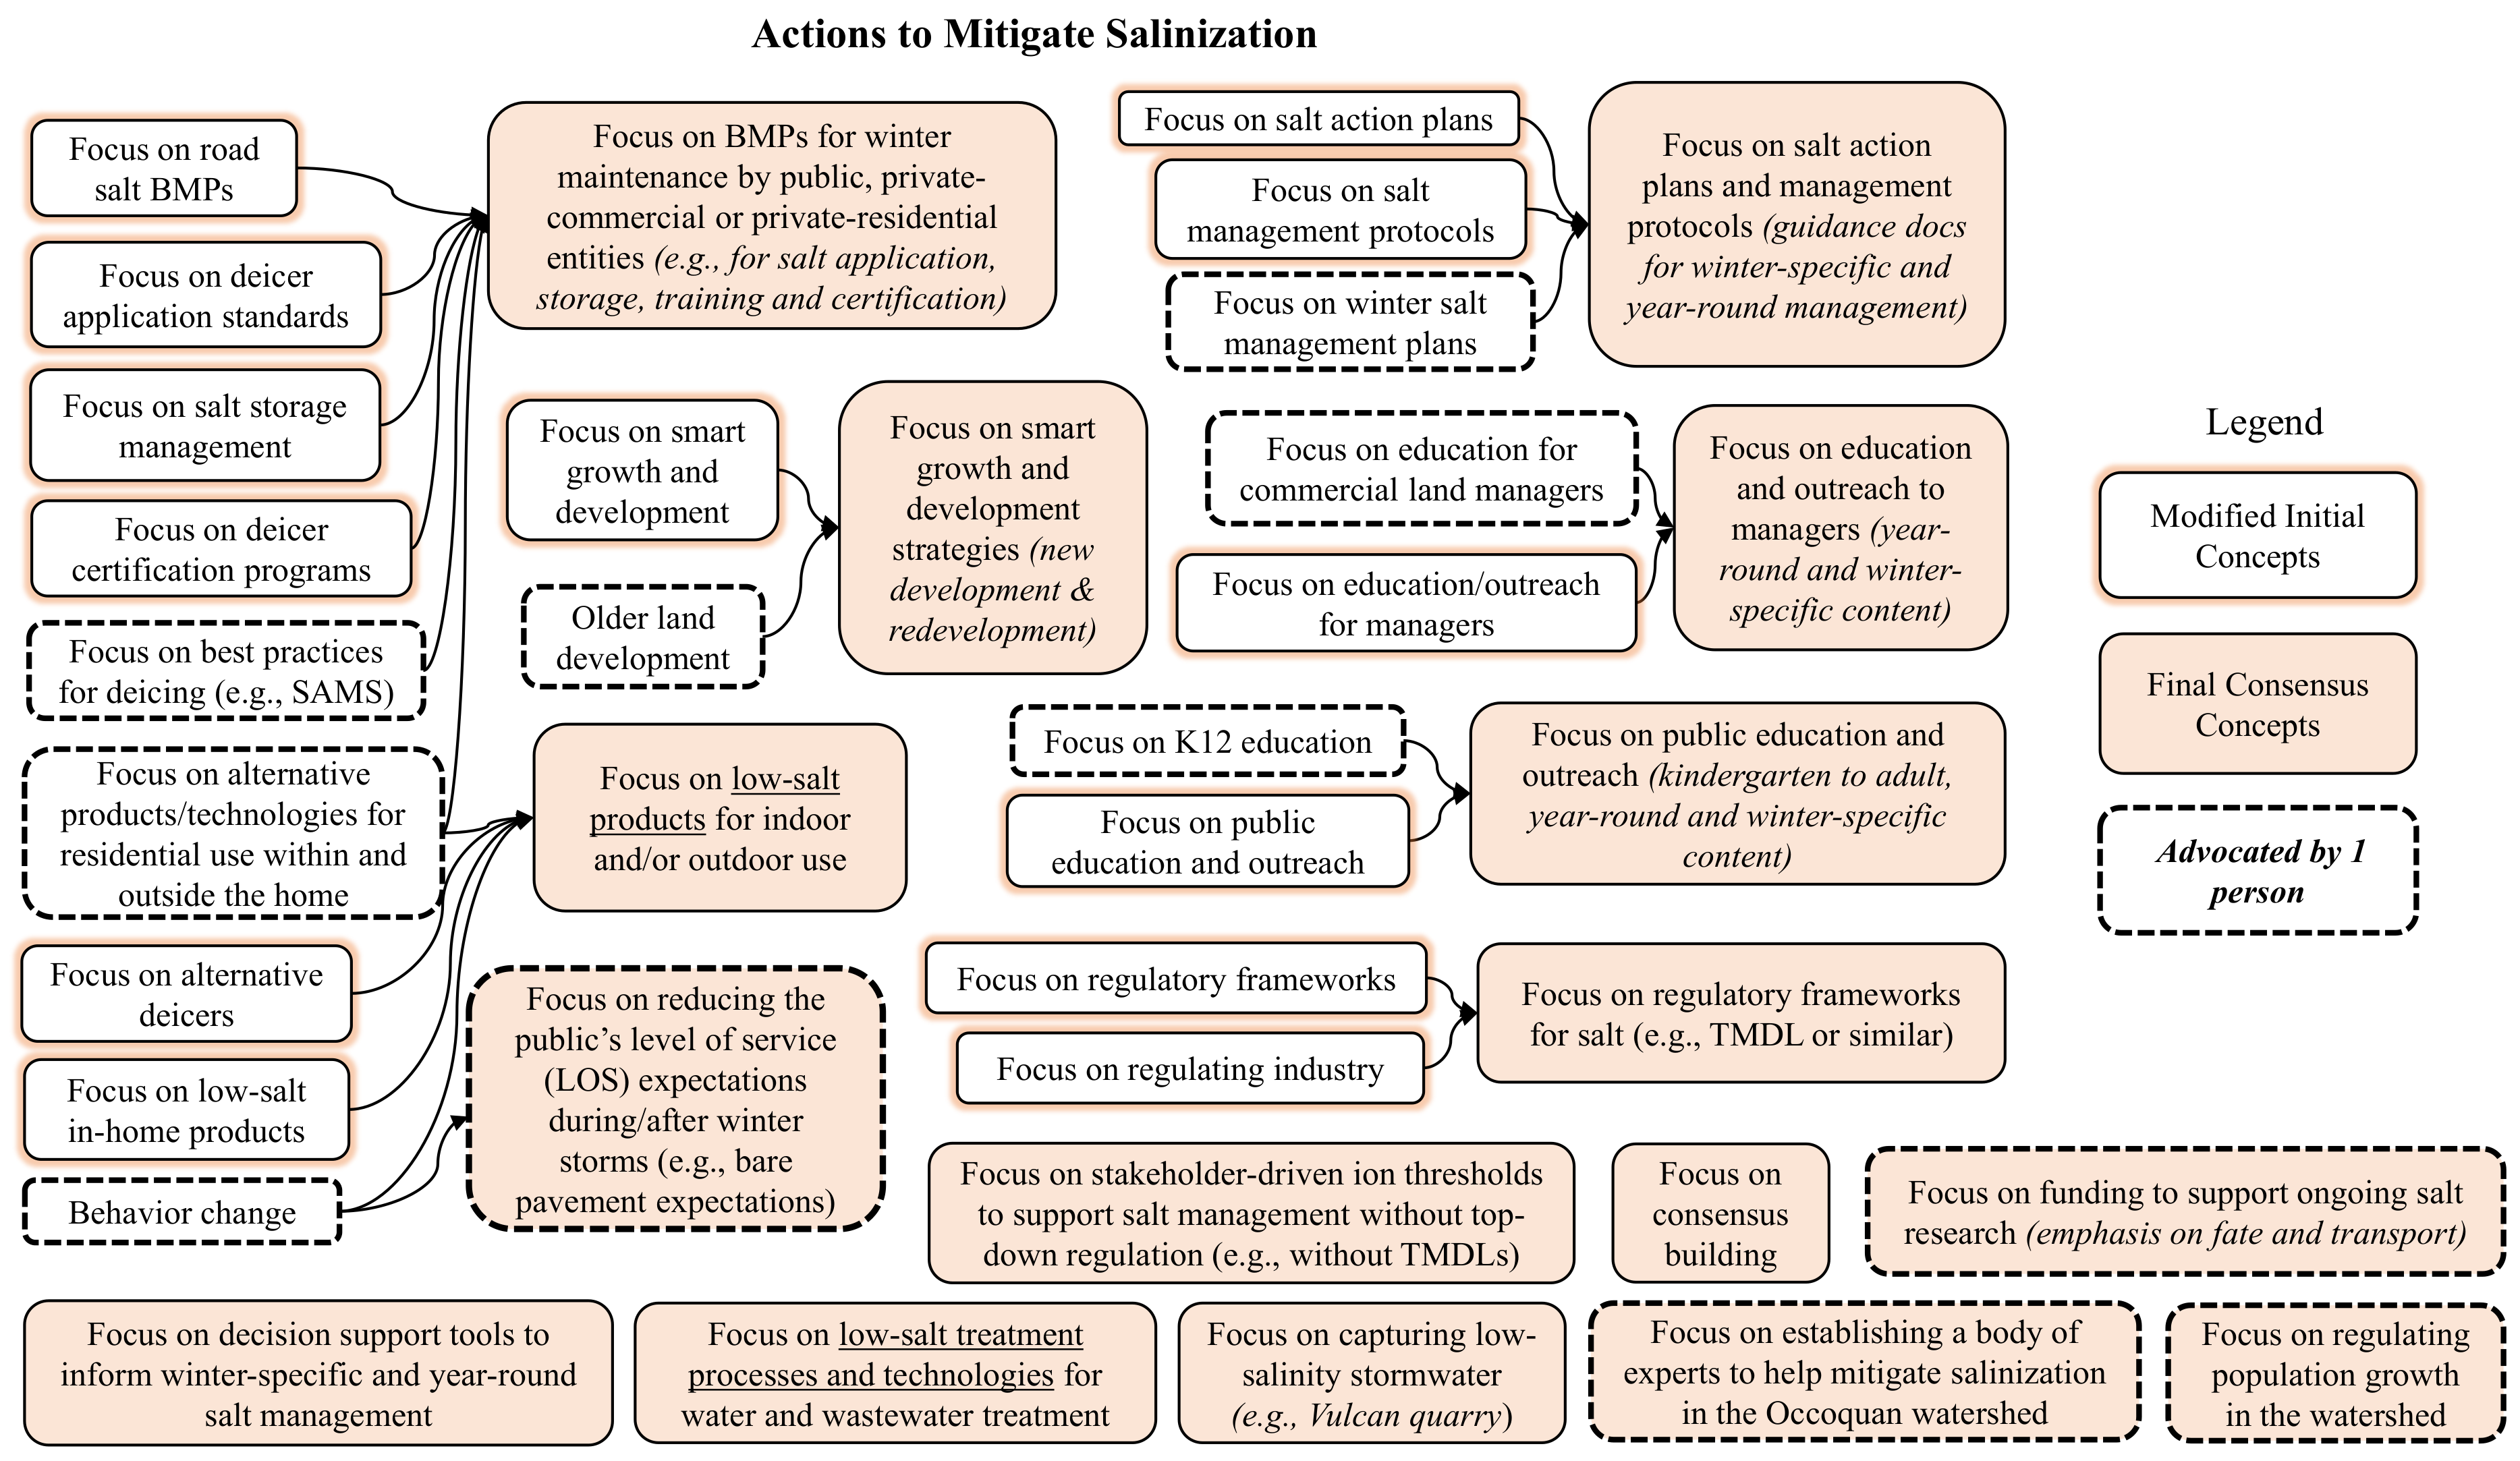


Supplemental Figure 5, Part 1


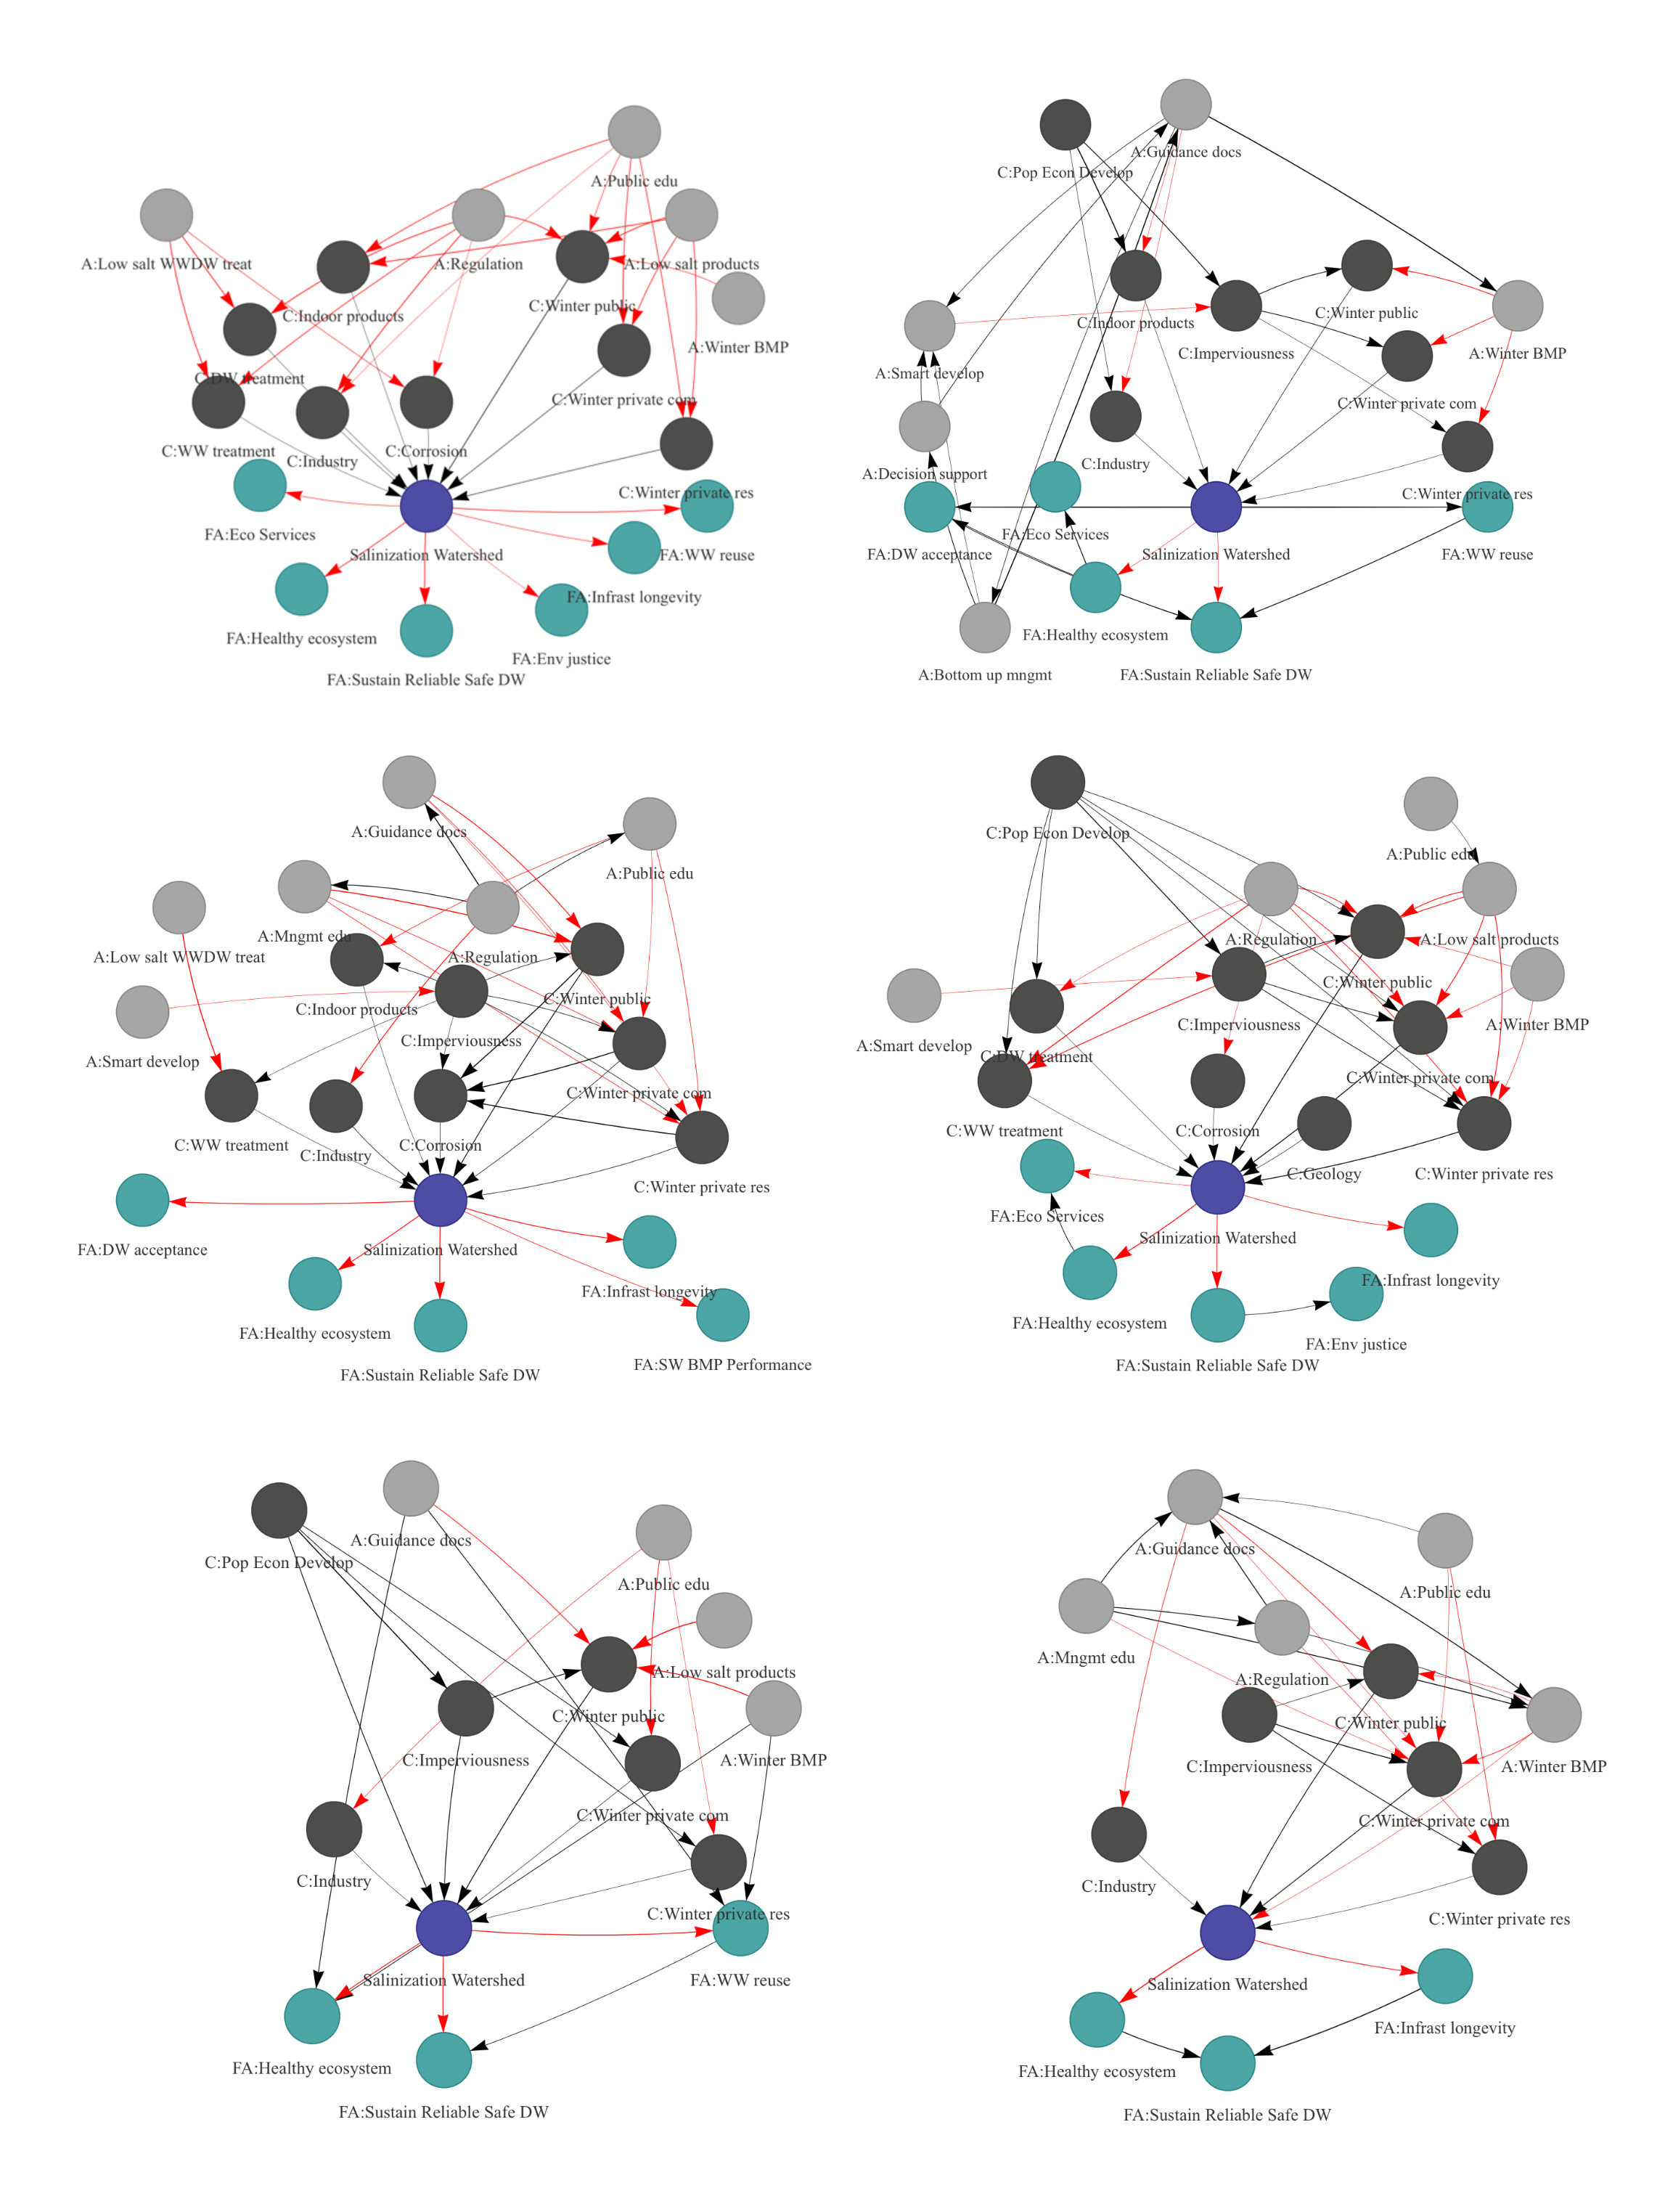


Supplemental Figure 5, Part 2


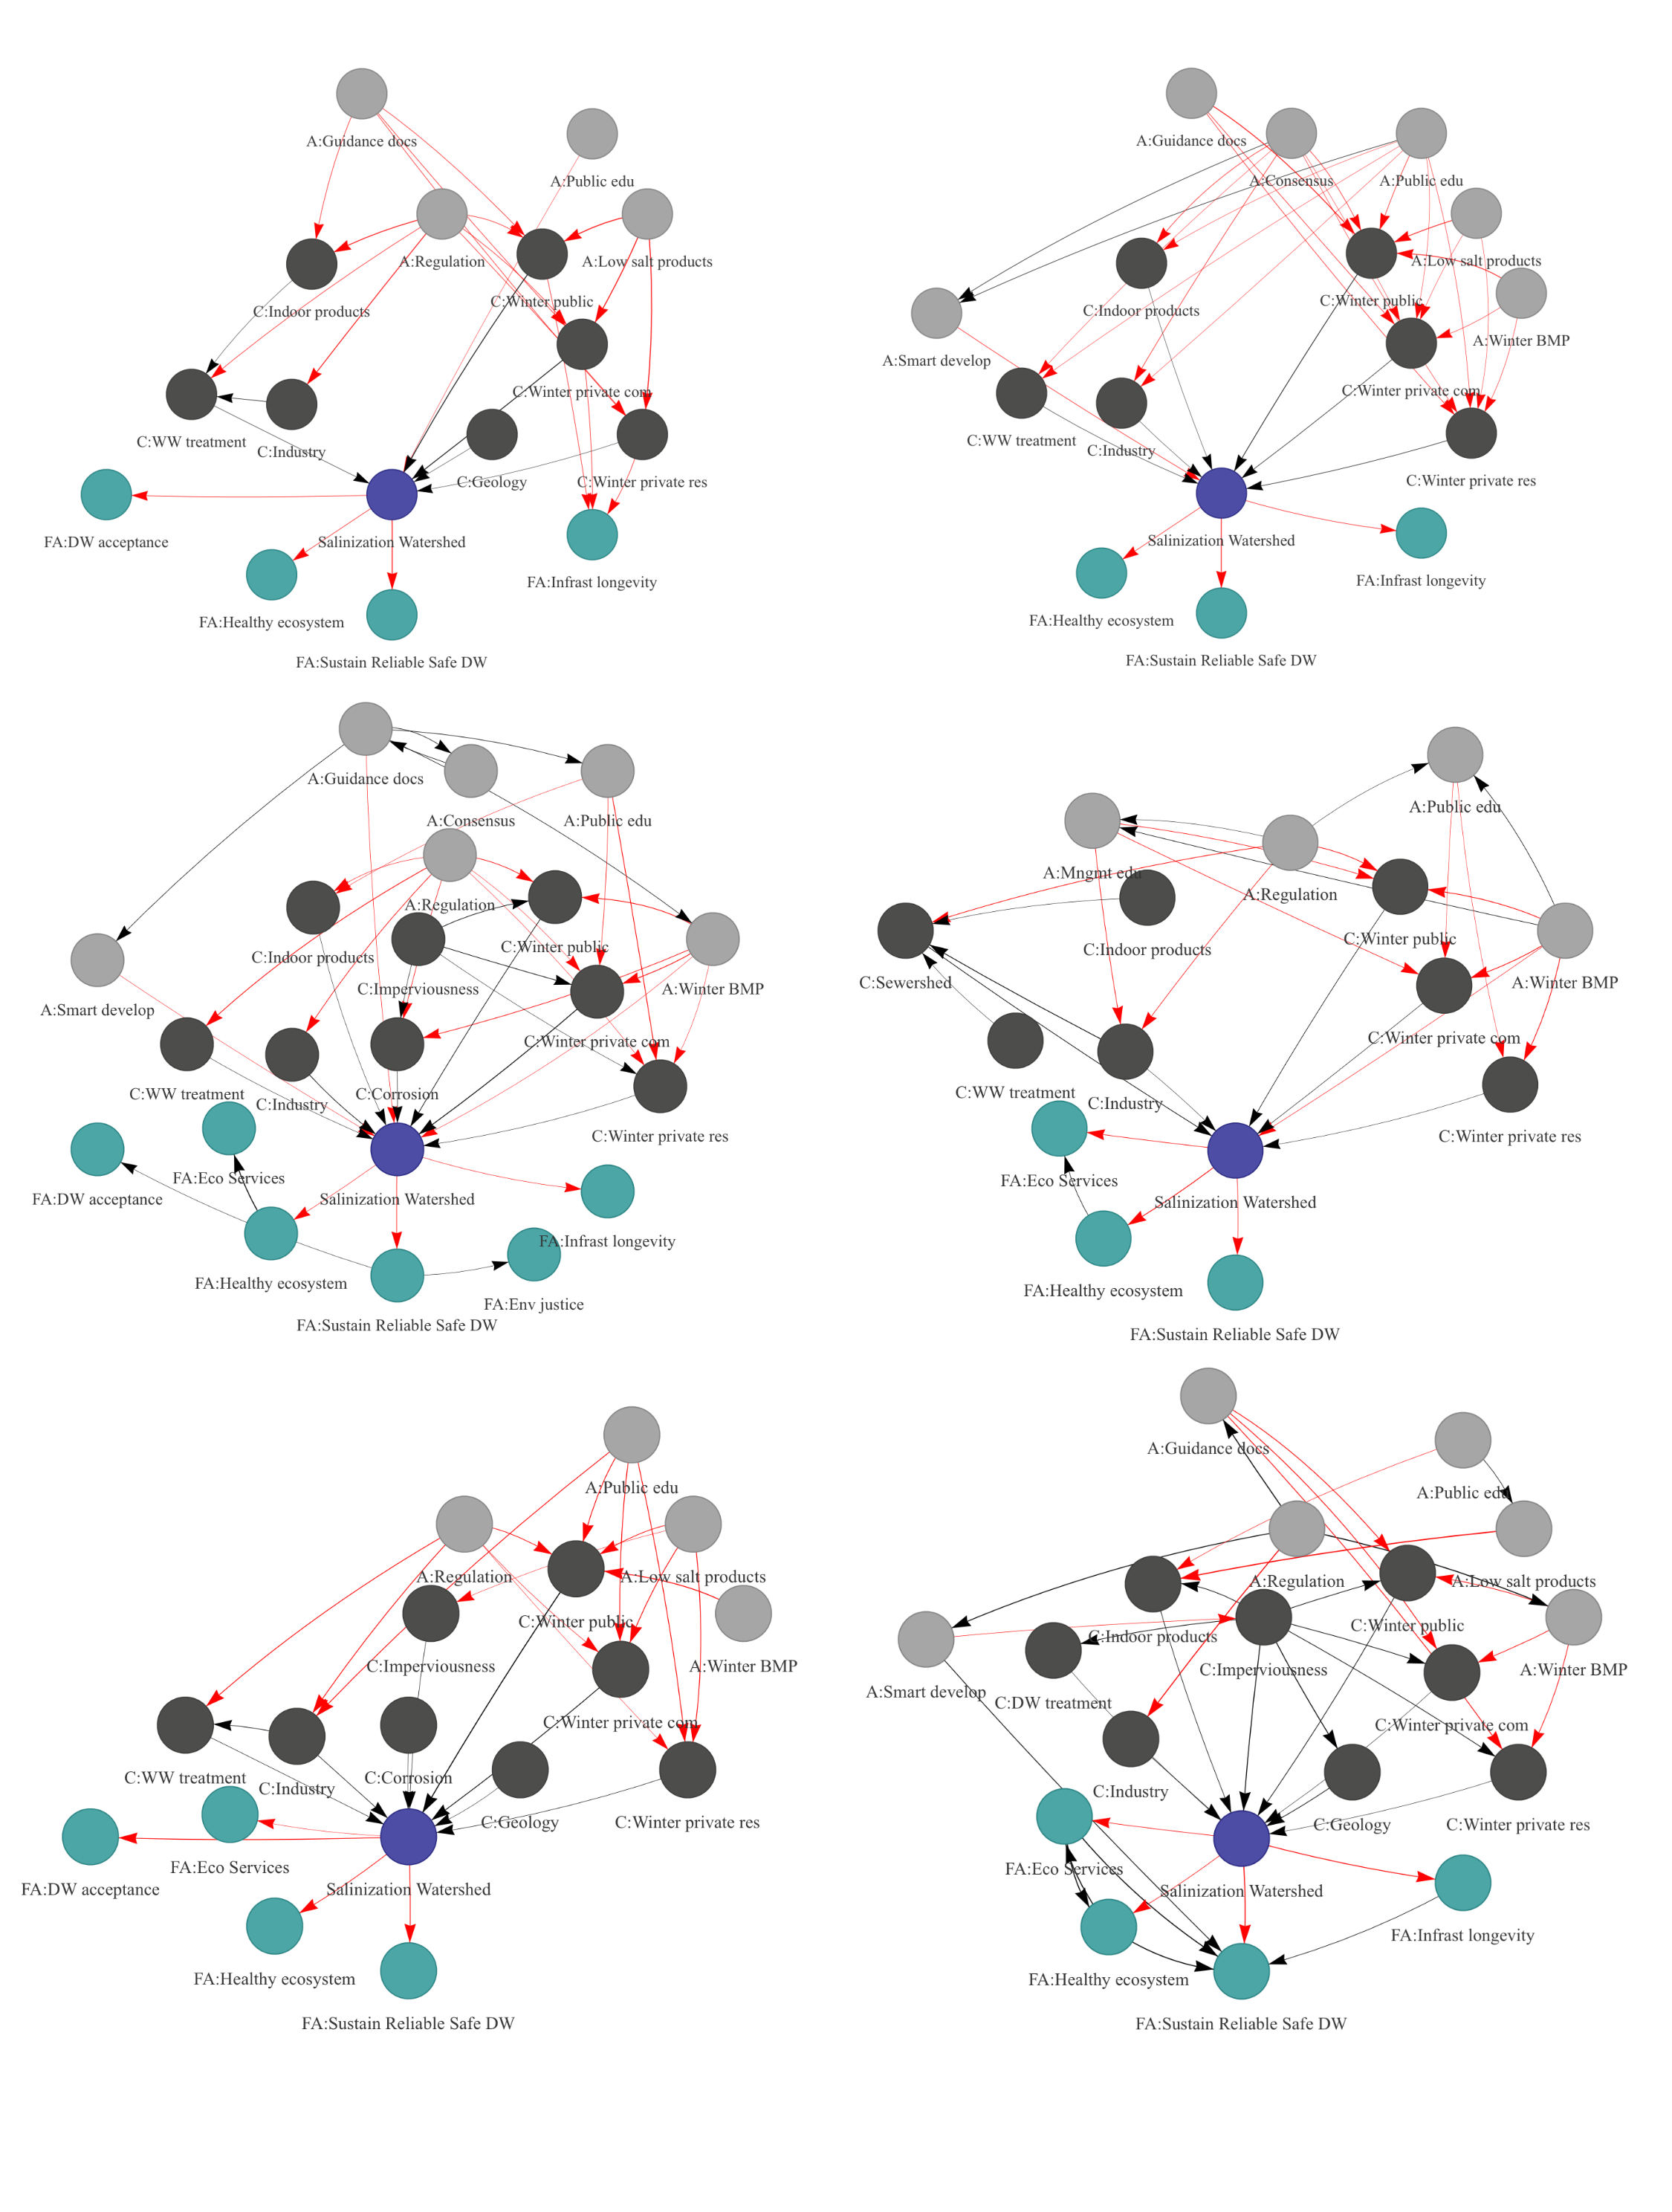


Supplemental Figure 5, Part 3


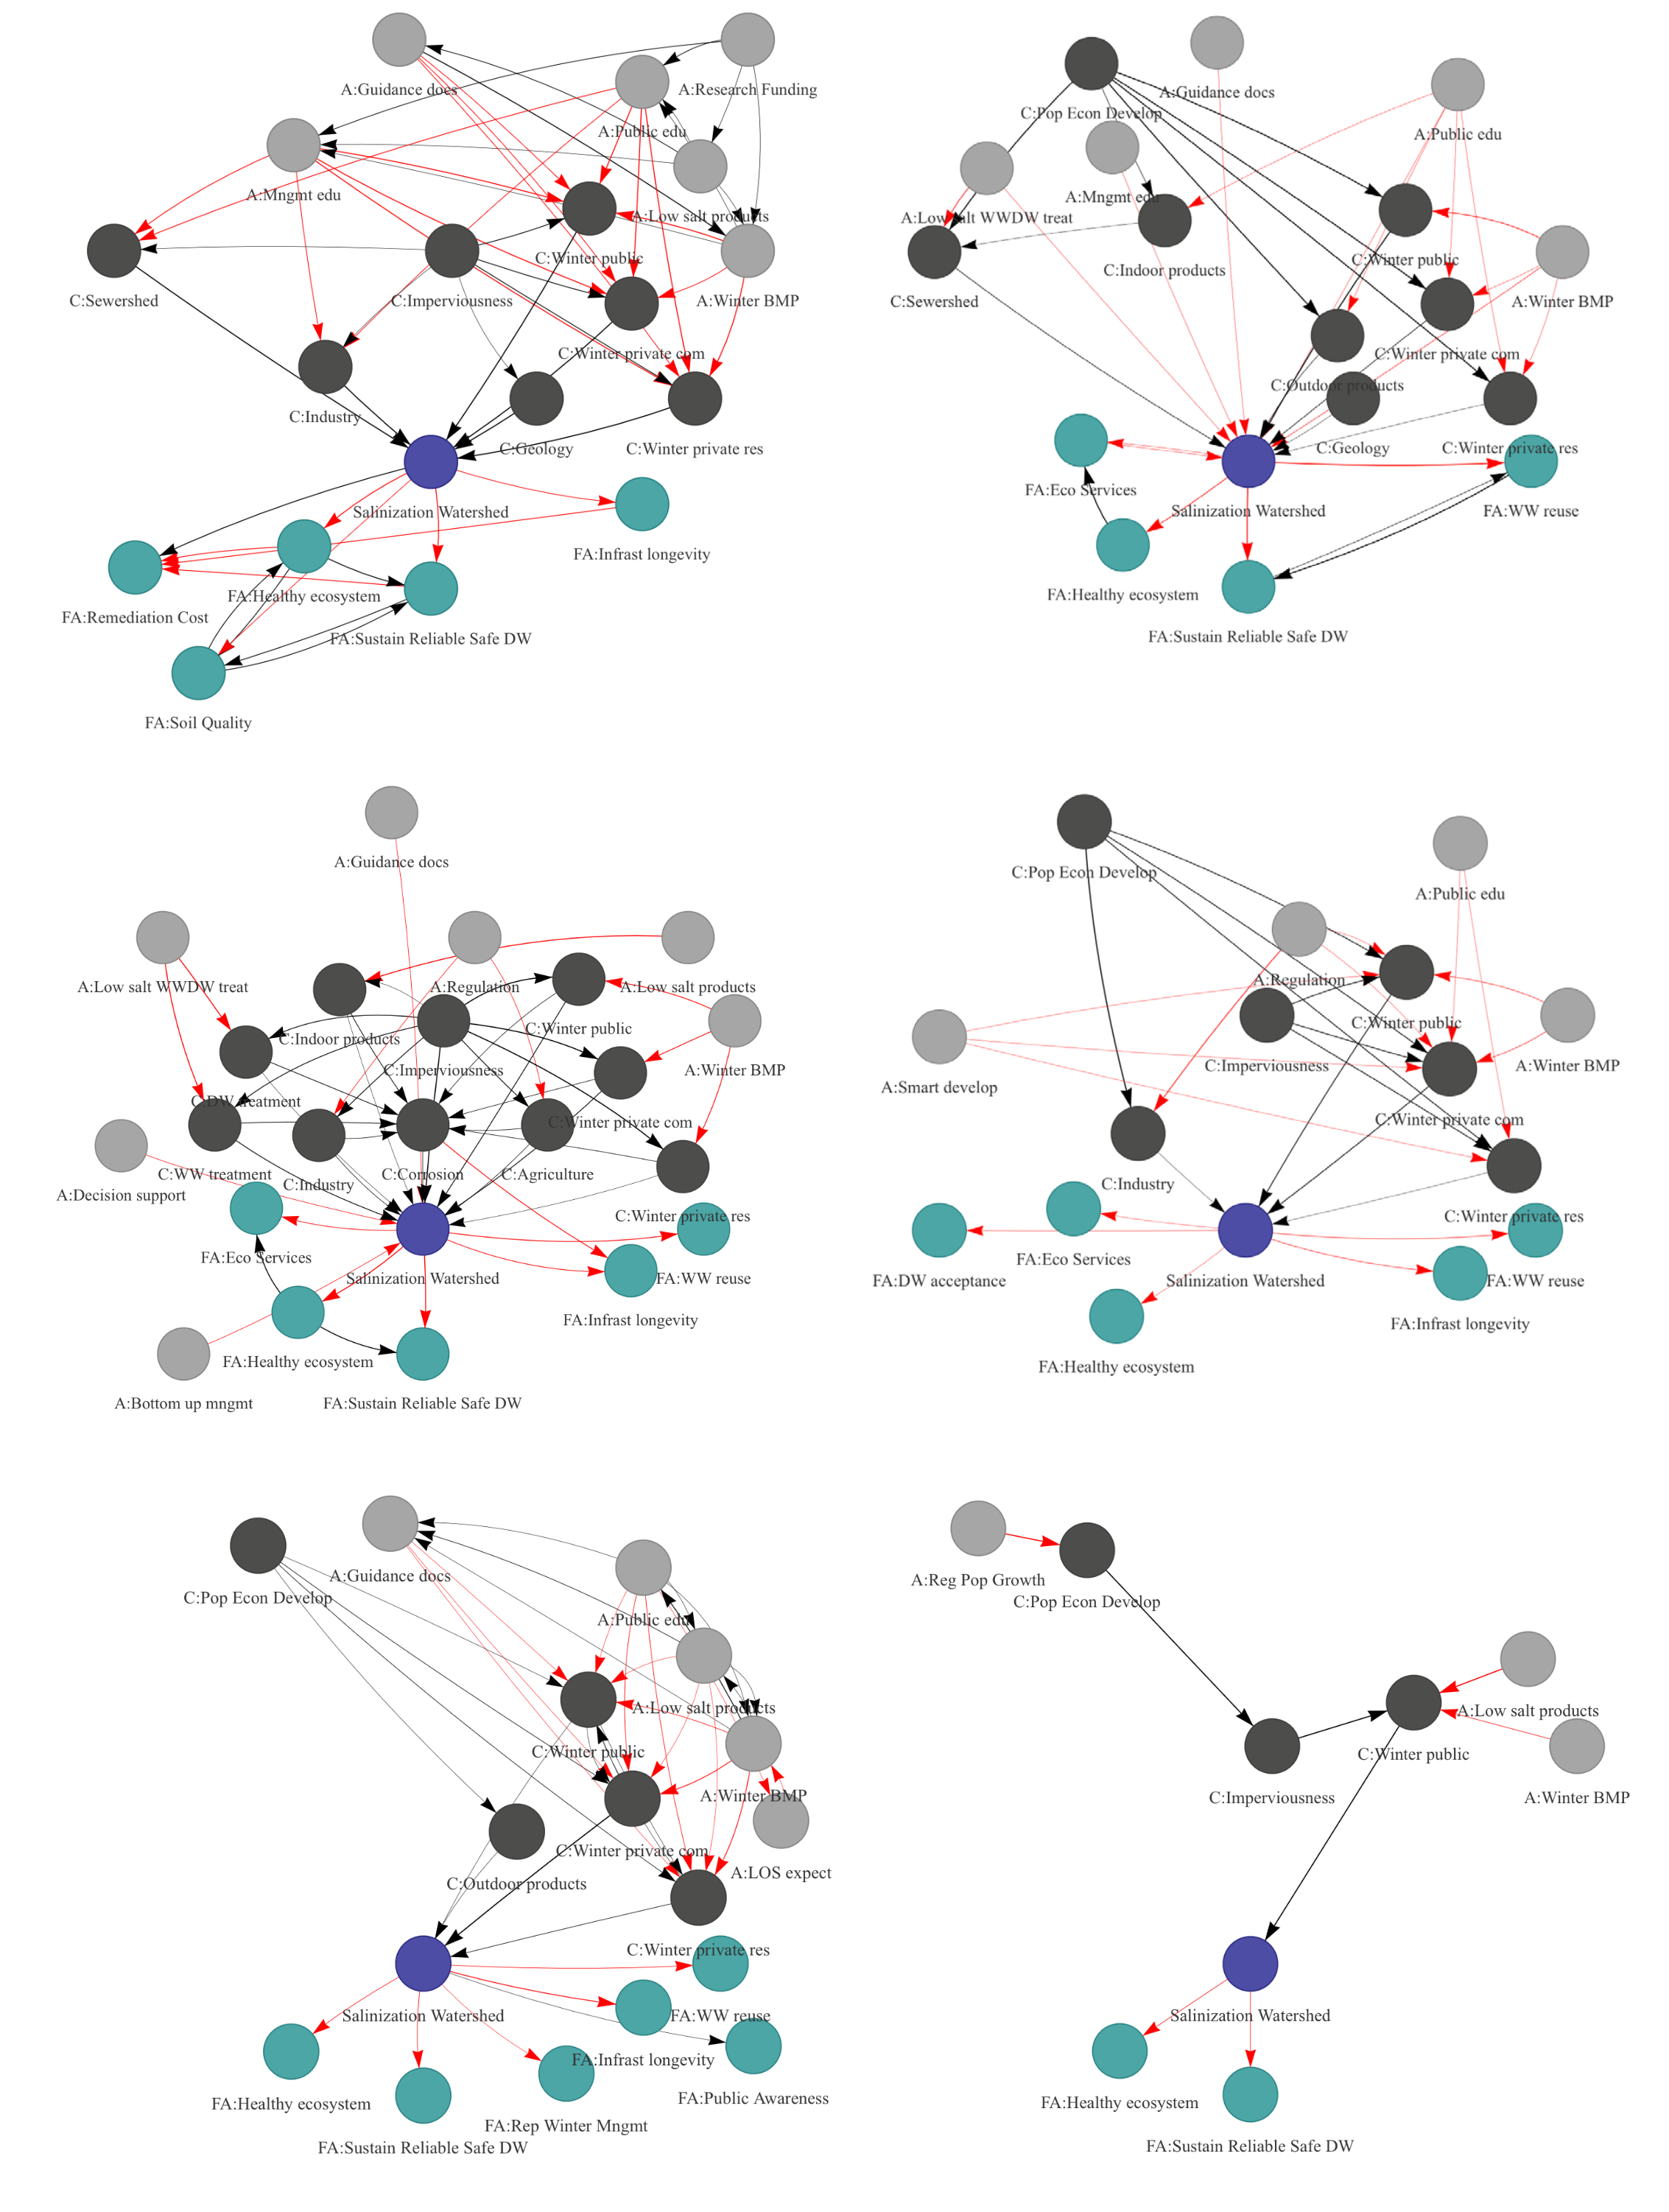


Supplemental Figure 5, Part 4


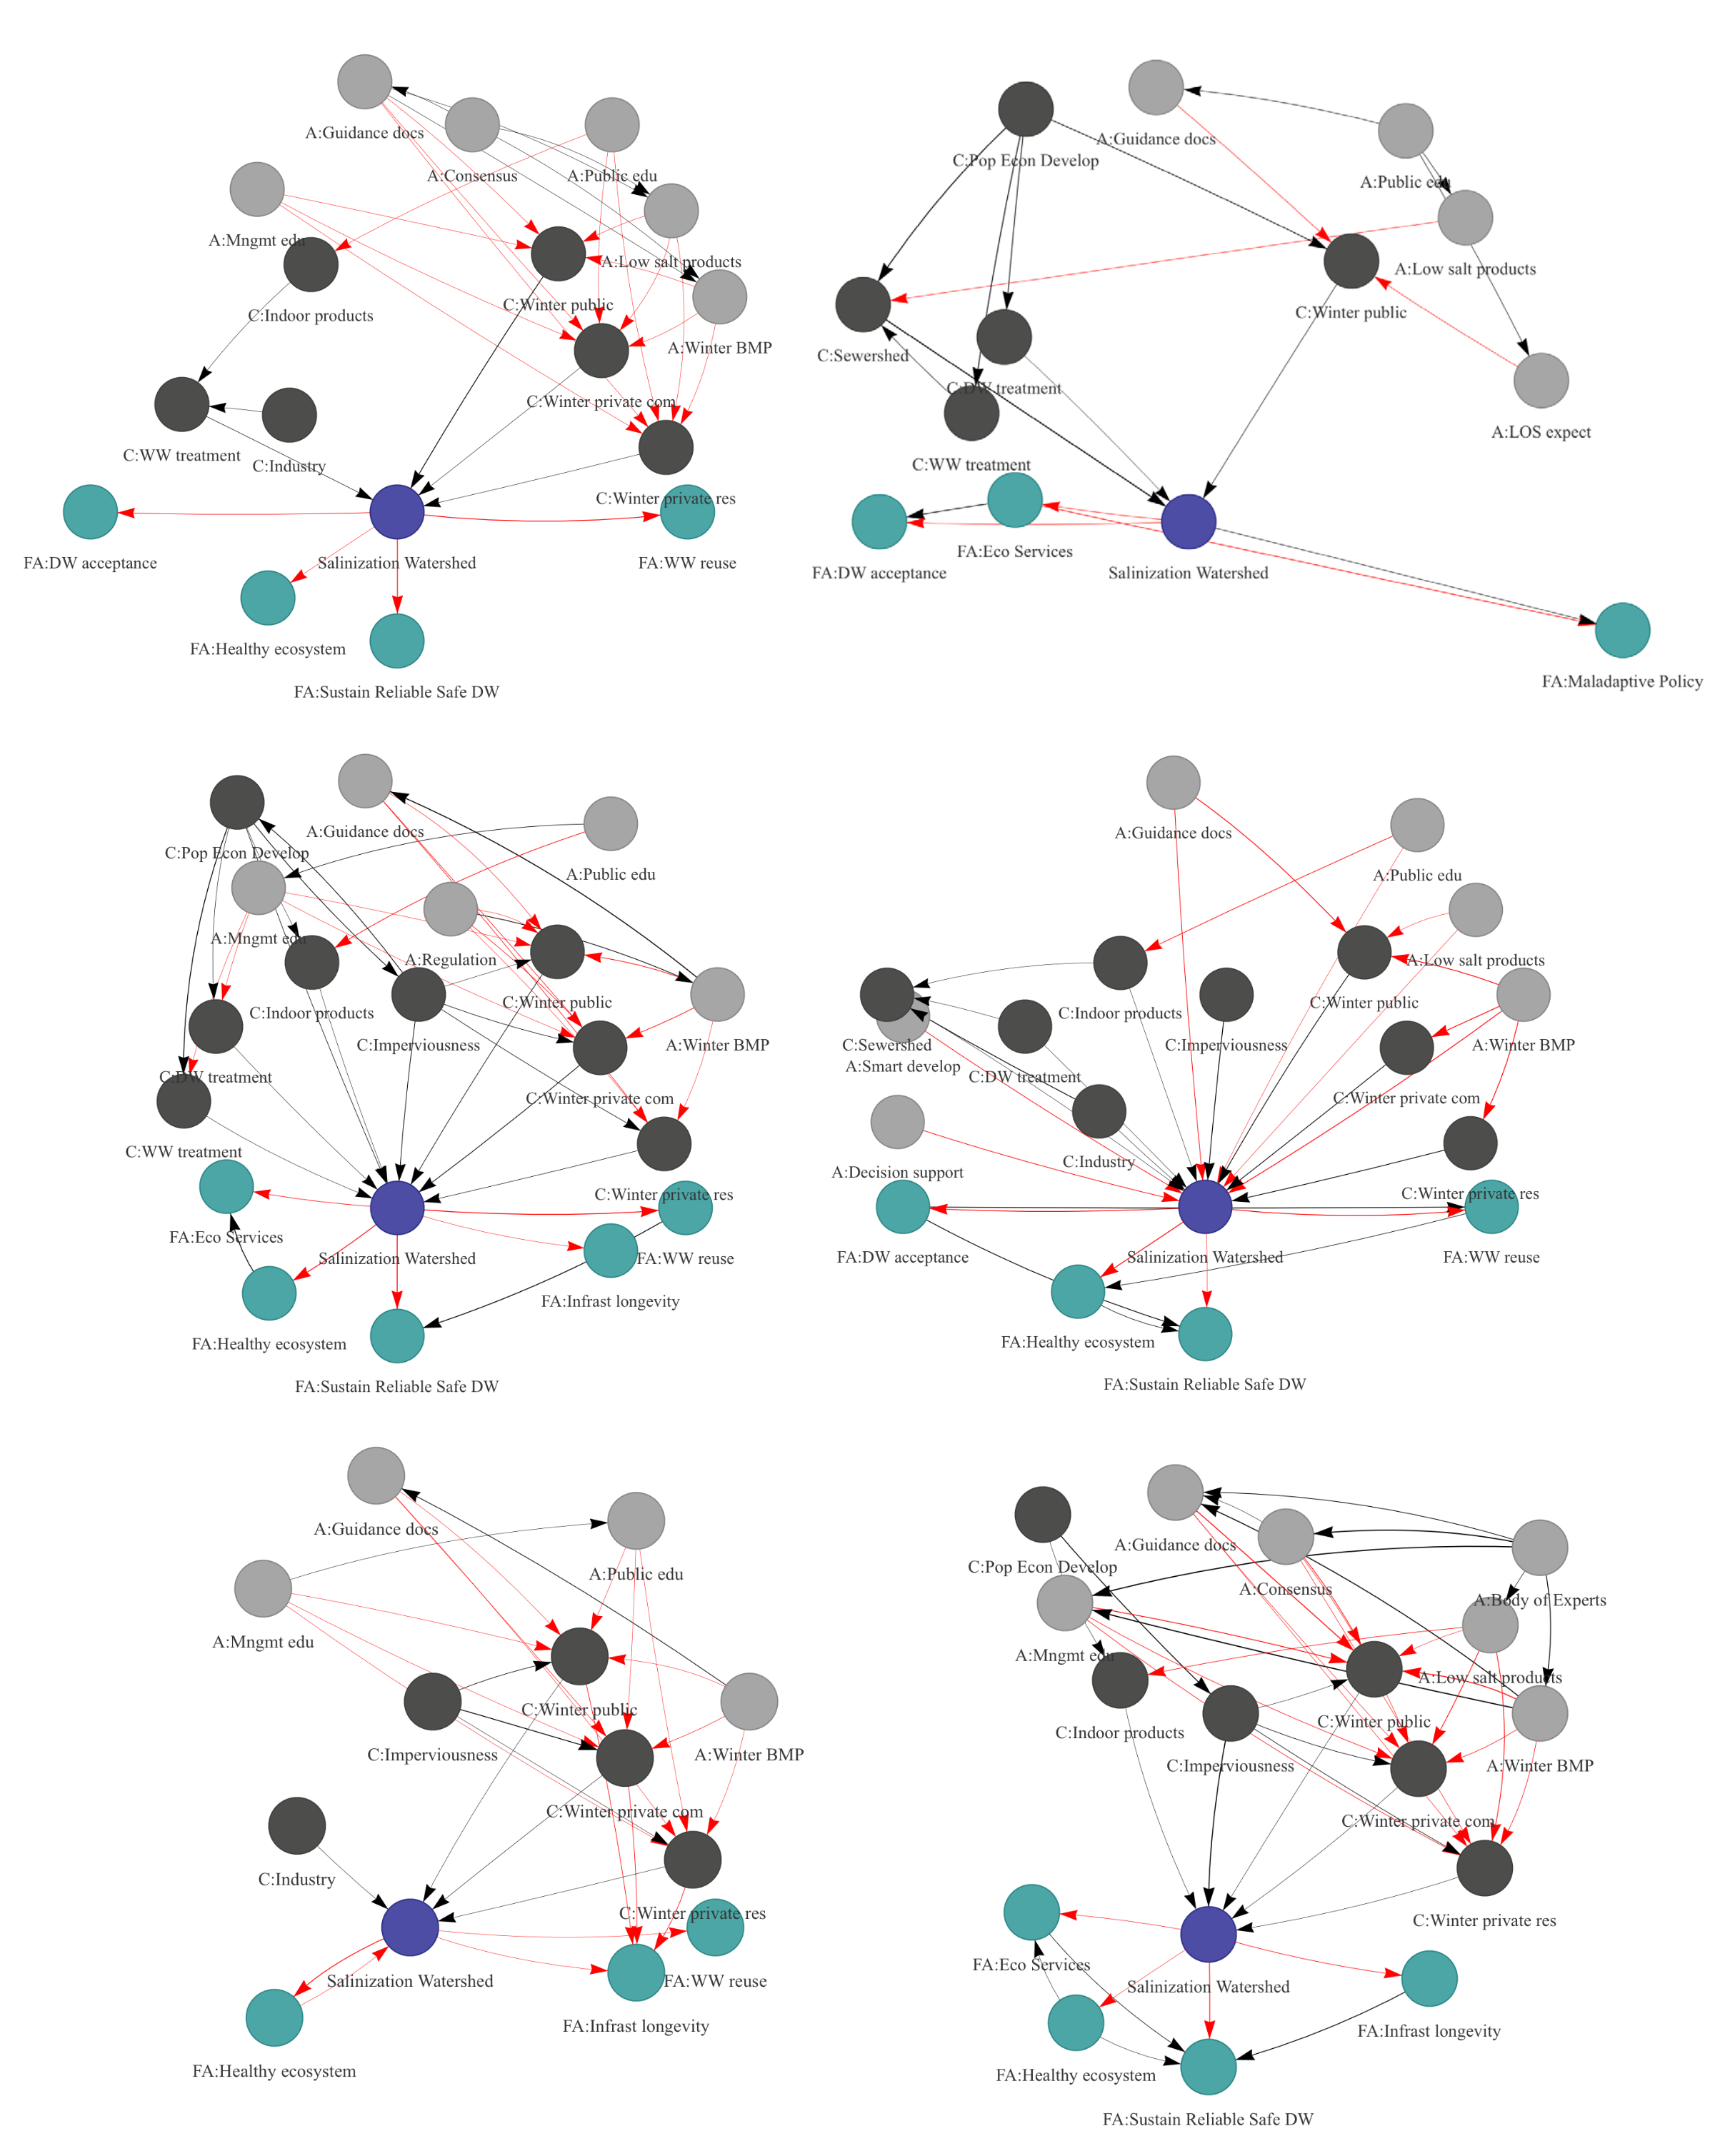


Supplemental Figure 5, Part 5


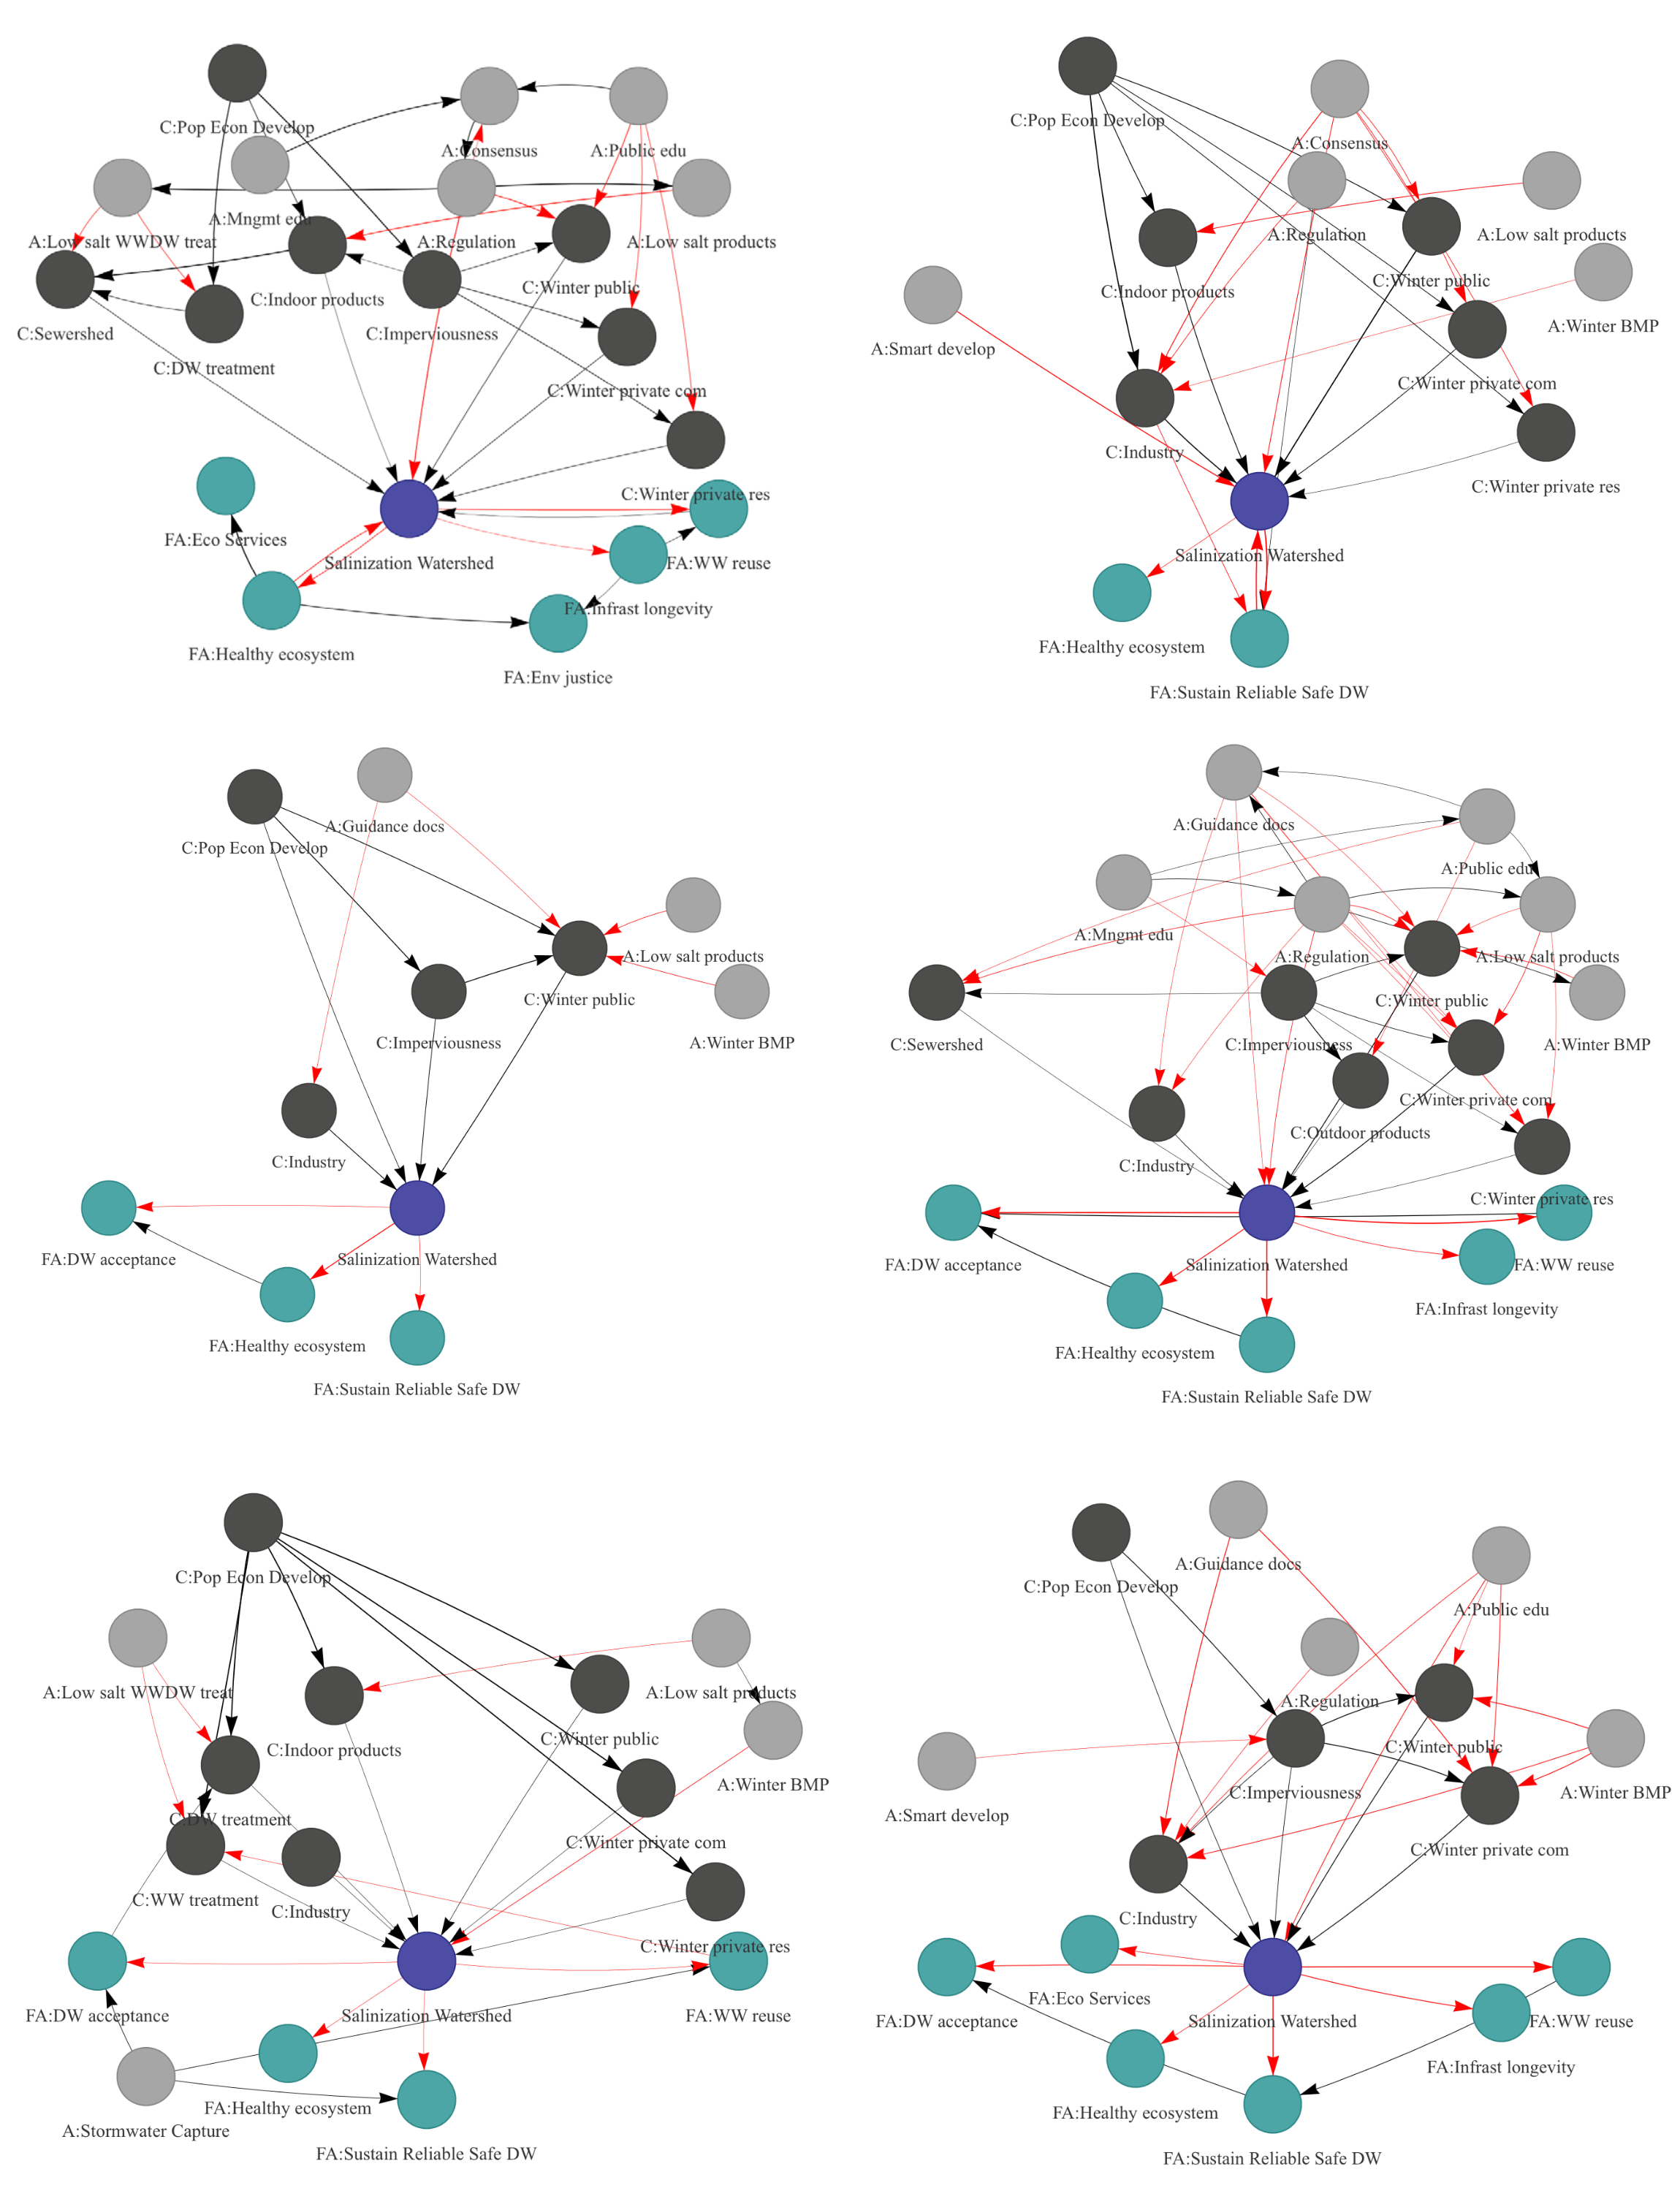


Supplemental Figure 5, Part 6


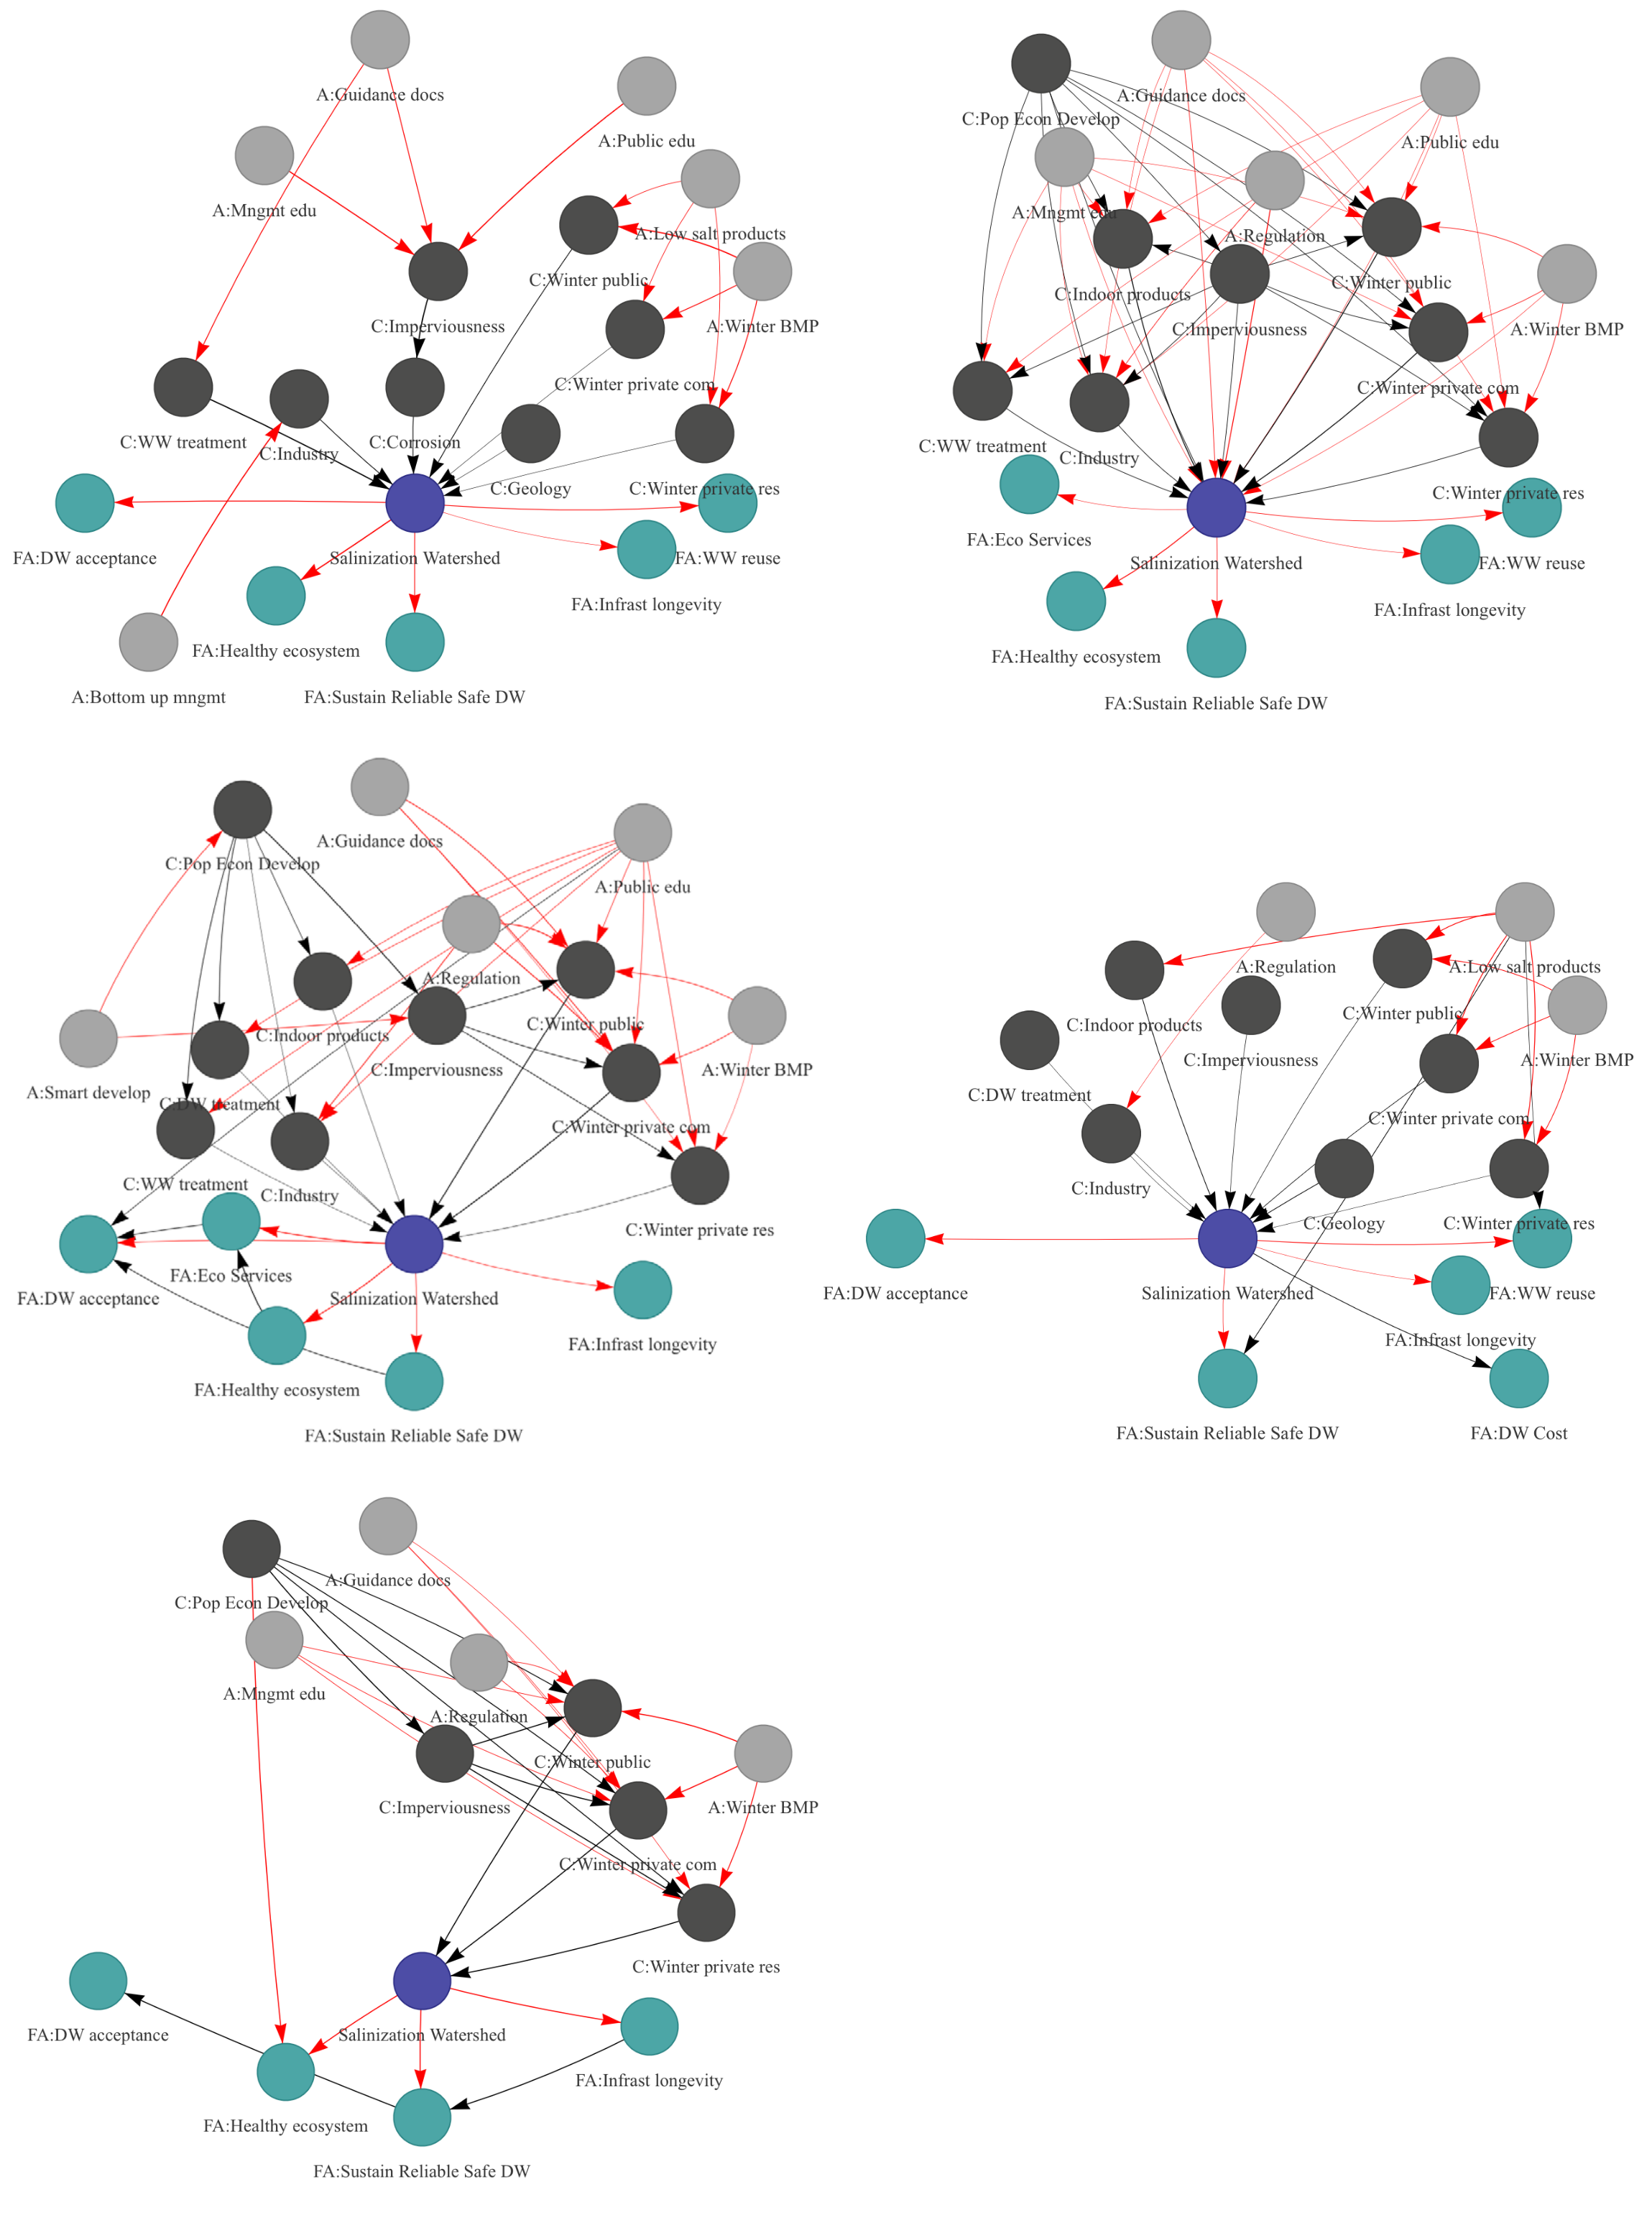


**Supplemental Figure 5**: Fuzzy Cognitive Maps (FCMs) representing the perceived SES for freshwater salinization for each individual stakeholder. Maps are shown in random order. The central concept (Salinization of the Watershed) is shown in blue, causes of salinization are shown in black, factors affected by salinization are shown in teal, and mitigating actions are shown in grey. See supplemental Tables 1-3 for full concept definitions. Black arrows indicate perceived causal relationships that are positive (i.e., concept 1 is presumed to increase concept 2) and red arrows indicate perceived causal relationships that are negative (i.e., concept 1 is presumed to decrease concept 2).
